# Supplementary material for: Temperature variability in southern Europe over the past 16 500 years constrained by speleothem fluid inclusion water isotopes
Source: Copernicus journal article supplement (doi:10.5194/cp-21-1235-2025), 2025-07-16
Supplement: Supplementary file 1 [file cp-21-1235-2025-supplement.zip]

## Sheet: MEN2
depth (mm)	AGE BP	error_plus	error_minus	d18O	d18OIVcorrected
0	6278.89	6327.05	6233.35	-5.60629	-5.68009
1	6299.94	6346.91	6255.3	-5.42142	-5.49522
2	6320.94	6366.77	6277.09	-5.56156	-5.63536
3	6341.87	6386.55	6298.48	-5.45724	-5.53104
4	6362.73	6406.3	6319.49	-5.63557	-5.71127
5	6383.53	6426.12	6340.11	-5.39581	-5.47151
6	6404.14	6446.23	6359.95	-5.68708	-5.76278
7	6424.51	6466.75	6378.82	-5.46426	-5.53996
8	6444.82	6487.25	6397.86	-5.45373	-5.52943
9	6465.23	6507.37	6417.98	-5.44325	-5.52115
10	6485.56	6527.39	6438.01	-5.29958	-5.37748
11	6505.64	6547.65	6456.95	-5.6433	-5.7212
12	6525.66	6567.88	6476.55	-5.49681	-5.57471
13	6545.84	6587.79	6498.4	-5.73962	-5.81752
14	6565.96	6607.43	6520.6	-5.70814	-5.78814
15	6585.88	6627.01	6541.24	-5.51833	-5.59833
16	6605.99	6646.89	6561.68	-5.54537	-5.62537
17	6626.68	6667.3	6583.51	-5.52898	-5.60898
18	6647.75	6687.81	6605.97	-5.69345	-5.77345
19	6668.89	6707.99	6628.02	-5.68512	-5.76692
21	6711.03	6748.12	6672.24	-5.64429	-5.72609
22	6732.05	6768.36	6694.79	-5.71592	-5.79772
23	6753.12	6788.7	6717.38	-5.57517	-5.65697
24	6774.32	6809.04	6739.85	-5.50418	-5.58808
25	6795.66	6829.35	6762.13	-5.75479	-5.83869
26	6817.03	6849.75	6784.39	-5.95924	-6.04314
27	6838.3	6870.34	6806.8	-5.72401	-5.80791
28	6859.56	6891.01	6829.23	-5.62697	-5.71287
29	6880.88	6911.59	6851.54	-5.8963	-5.9822
30	6902.15	6932.05	6873.86	-5.55131	-5.63721
31	6923.28	6952.47	6896.31	-5.8068	-5.8927
32	6944.42	6973.1	6918.81	-5.64798	-5.73388
33	6965.72	6994.1	6941.26	-5.50278	-5.59058
34	6987.07	7015.1	6963.64	-5.98123	-6.06903
35	7008.38	7035.74	6985.95	-5.78425	-5.87205
36	7029.64	7056.29	7008.21	-5.69412	-5.78192
37	7050.9	7077.06	7030.37	-5.95433	-6.04213
38	7072.12	7097.89	7052.32	-5.67382	-5.76382
39	7093.3	7118.52	7074	-5.8179	-5.9079
40	7114.53	7138.99	7095.71	-5.5887	-5.6787
41	7135.9	7159.4	7117.66	-5.57148	-5.66148
42	7157.3	7180.02	7139.46	-5.64273	-5.73463
43	7178.61	7201.07	7160.74	-5.77849	-5.87039
44	7199.89	7222.33	7181.95	-5.63875	-5.73065
45	7221.22	7243.52	7203.57	-5.41659	-5.50849
46	7242.57	7264.5	7225.3	-5.47401	-5.56591
47	7263.9	7285.24	7246.77	-5.58115	-5.67515
48	7285.22	7306.01	7268.02	-5.56687	-5.66087
49	7306.54	7327.05	7289.16	-5.59206	-5.68606
50	7327.93	7348.3	7310.13	-5.59707	-5.69107
51	7349.43	7369.58	7330.9	-5.48142	-5.57542
52	7370.97	7390.77	7351.64	-5.48032	-5.57672
53	7392.45	7411.8	7372.44	-5.63946	-5.73586
54	7413.88	7432.89	7393.07	-5.56571	-5.66211
55	7435.3	7454.22	7413.29	-5.61184	-5.70824
56	7456.73	7475.62	7433.3	-5.29501	-5.39351
57	7478.2	7496.85	7453.37	-5.64792	-5.74642
58	7499.65	7517.97	7473.57	-5.77566	-5.87416
59	7521.03	7539.17	7493.87	-5.56397	-5.66247
60	7542.42	7560.87	7514.11	-5.65126	-5.74976
61	7563.88	7583.33	7534.14	-5.4856	-5.5866
62	7585.38	7605.71	7554.07	-5.50392	-5.60492
63	7606.87	7627.71	7574.04	-5.54528	-5.64628
64	7628.45	7652.07	7594.18	-5.69073	-5.79173
65	7650.22	7680.97	7614.53	-5.63317	-5.73417
66	7672.19	7711.35	7635	-5.69097	-5.79457
67	7694.35	7739.48	7655.55	-5.65058	-5.75418
68	7716.74	7764.33	7676.42	-5.54325	-5.64685
69	7739.35	7785.99	7697.84	-5.49408	-5.59768
70	7761.83	7806.33	7719.42	-5.29344	-5.39934
71	7783.85	7827.04	7740.81	-5.62237	-5.72827
72	7805.48	7847.37	7762.26	-5.79589	-5.90179
73	7826.91	7866.44	7784.17	-5.78045	-5.88635
74	7848.27	7885.27	7806.85	-5.66981	-5.77571
75	7869.63	7904.94	7830.33	-5.63246	-5.74096
76	7890.79	7924.9	7853.69	-5.59155	-5.70005
77	7911.56	7944.46	7876.11	-5.55103	-5.65953
78	7932.15	7964.03	7898.01	-5.59869	-5.70719
79	7952.82	7984.13	7919.9	-5.70247	-5.81097
80	7973.58	8004.77	7941.1	-5.52503	-5.63643
81	7994.34	8025.76	7961.01	-5.5451	-5.6565
82	8014.95	8046.75	7980.29	-5.46859	-5.57999
83	8035.28	8067.52	7999.74	-5.67734	-5.78874
84	8055.35	8088.63	8019.28	-5.66806	-5.78246
85	8075.24	8110.55	8038.74	-5.57856	-5.69296
86	8095.13	8132.74	8058.25	-5.83183	-5.94623
87	8115.04	8154.55	8077.94	-5.98256	-6.09696
88	8134.21	8176.01	8097.49	-5.81079	-5.92519
89	8152.06	8197.12	8116.59	-5.94499	-6.05939
90	8169.25	8217.19	8135.5	-5.88889	-6.00659
91	8186.62	8235.77	8154.55	-6.12818	-6.24588
92	8204.43	8254.15	8173.75	-5.80397	-5.92167
93	8222.69	8273.44	8193.05	-5.731	-5.8487
94	8241.12	8292.32	8212.44	-6.01866	-6.13636
95	8259.47	8309.05	8231.88	-6.11204	-6.23294
96	8277.95	8322.58	8251.25	-6.03636	-6.15726
97	8296.8	8333.04	8270.43	-6.02767	-6.14857
98	8315.87	8344.84	8289.6	-5.88374	-6.00464
99	8334.97	8361.79	8308.9	-5.51154	-5.63244
100	8354.08	8381.27	8328.3	-5.69368	-5.81838
101	8373.2	8400.05	8347.72	-5.44836	-5.57306
102	8392.4	8418.73	8367.14	-5.65338	-5.77808
103	8411.71	8438.43	8386.56	-5.62581	-5.75051
104	8431.03	8458.32	8405.98	-5.56941	-5.69411
105	8450.26	8477.44	8425.42	-5.77786	-5.90256
106	8469.4	8496.11	8444.75	-5.63544	-5.76364
107	8488.5	8514.84	8463.84	-5.74315	-5.87135
108	8507.64	8533.78	8482.86	-5.63842	-5.76662
109	8526.86	8552.95	8501.94	-5.37155	-5.49975
110	8546.1	8572.32	8521.12	-5.53818	-5.66638
111	8565.27	8591.85	8540.34	-5.29653	-5.42853
112	8584.42	8611.65	8559.52	-5.35538	-5.48738
113	8603.59	8631.73	8578.57	-5.37771	-5.50971
114	8622.79	8651.62	8597.55	-5.54019	-5.67219
115	8642	8670.89	8616.55	-5.49268	-5.62468
116	8661.19	8689.91	8635.66	-5.25266	-5.38886
117	8680.33	8709.11	8654.9	-5.75496	-5.89116
118	8699.4	8728.38	8674.03	-5.70918	-5.84538
119	8718.39	8747.55	8692.82	-5.57347	-5.70967
120	8737.43	8766.68	8711.48	-5.69405	-5.83025
121	8756.62	8785.82	8730.26	-5.32769	-5.46819
122	8775.8	8804.85	8749.11	-5.39391	-5.53441
123	8794.83	8823.71	8767.97	-5.14477	-5.28527
124	8813.86	8842.96	8786.86	-5.16404	-5.30454
125	8833.07	8862.99	8805.86	-5.35823	-5.49873
126	8852.3	8883.07	8824.89	-5.01833	-5.15883
127	8871.44	8902.49	8843.87	-5.23485	-5.38005
128	8890.57	8921.68	8862.75	-5.30556	-5.45076
129	8909.79	8941.16	8881.55	-5.25498	-5.40018
130	8929.01	8960.84	8900.4	-5.33007	-5.47527
131	8948.17	8980.48	8919.41	-5.15601	-5.30121
132	8967.31	9000.17	8938.51	-5.36005	-5.51045
133	8986.53	9020.01	8957.56	-5.54709	-5.69749
134	9005.75	9039.93	8976.53	-5.4385	-5.5889
135	9024.89	9059.87	8995.37	-5.49523	-5.64563
136	9044.04	9079.76	9013.98	-5.06971	-5.22011
137	9063.26	9099.52	9032.35	-5.14425	-5.29985
138	9082.53	9118.99	9050.85	-5.14546	-5.30106
139	9101.77	9138.1	9069.75	-5.55987	-5.71547
140	9120.91	9157.28	9088.52	-5.39036	-5.54596
141	9139.92	9176.94	9106.77	-5.18661	-5.34221
142	9158.93	9197.04	9125.66	-5.0799	-5.2411
143	9178.06	9217.2	9146.15	-5.3317	-5.4929
144	9197.34	9235.99	9167	-5.36244	-5.52364
145	9216.72	9252.33	9186.89	-5.43523	-5.59643
146	9235.94	9267.43	9206.43	-5.14977	-5.31097
147	9254.84	9282.95	9226.42	-4.9708	-5.1379
148	9273.81	9299.9	9246.49	-5.03299	-5.20009
149	9293.17	9318.69	9266.15	-4.78779	-4.95489
150	9312.52	9337.99	9285.55	-5.16742	-5.33452
151	9331.45	9356.51	9304.95	-5.28317	-5.45027
152	9350.25	9374.79	9324.5	-5.38719	-5.55429
153	9369.28	9393.61	9344.19	-5.36577	-5.53907
154	9388.39	9412.75	9363.59	-5.41536	-5.58866
155	9407.42	9431.85	9382.37	-5.20229	-5.37559
156	9426.46	9450.89	9400.93	-4.92577	-5.09907
157	9445.65	9469.94	9419.72	-5.29257	-5.46587
158	9464.94	9489.11	9438.56	-4.90495	-5.08465
159	9484.28	9508.45	9457.22	-4.9467	-5.1264
160	9503.59	9527.77	9475.9	-5.02196	-5.20166
161	9522.83	9546.86	9494.78	-5.01987	-5.19957
162	9542.07	9565.88	9513.67	-4.98077	-5.16047
163	9561.36	9585.01	9532.32	-5.07079	-5.25709
164	9580.68	9604.16	9550.81	-5.20663	-5.39293
165	9600	9623.26	9569.32	-5.19158	-5.37788
166	9619.34	9642.47	9588.08	-5.10952	-5.29582
167	9638.72	9661.91	9607.22	-5.16592	-5.35222
168	9658.02	9681.33	9626.26	-5.08605	-5.27895
169	9677.16	9700.51	9644.77	-5.26007	-5.45297
170	9696.35	9719.62	9663.07	-5.37154	-5.56444
171	9715.8	9738.91	9681.59	-4.78317	-4.97607
172	9735.53	9758.28	9700.46	-5.09498	-5.28788
173	9755.5	9777.62	9719.6	-5.08418	-5.28378
174	9775.55	9796.94	9738.37	-4.99131	-5.19091
175	9795.56	9816.25	9756.32	-5.01264	-5.21224
176	9815.58	9835.52	9774.33	-5.00481	-5.20441
177	9835.72	9854.75	9793.74	-5.07124	-5.27084
178	9856.16	9874.08	9816.43	-5.20142	-5.40772
179	9876.91	9893.62	9842.87	-5.04461	-5.25091
180	9897.33	9913.19	9867.55	-5.15979	-5.36609
181	9916.88	9932.64	9886.09	-5.04439	-5.25069
182	9936.16	9952.16	9904.82	-5.2306	-5.4369
183	9955.81	9971.9	9929.86	-5.25072	-5.46362
184	9975.61	9991.3	9956	-5.12892	-5.34182
185	9995.2	10010.2	9977.25	-5.04713	-5.26003
186	10014.4	10030.4	9995.75	-5.20424	-5.41714
187	10033.5	10052.6	10014.8	-5.03946	-5.25236
188	10053.5	10069.6	10034.3	-4.91831	-5.13791
189	10074.8	10079.4	10053.2	-5.11119	-5.33079
190	10092.7	10108.7	10071.9	-5.45386	-5.67346
191	10106.1	10176.9	10090.5	-5.02694	-5.24654
192	10133.6	10245.9	10109.5	-5.34597	-5.56557
193	10188.4	10277.4	10129.2	-5.21984	-5.44604
194	10244.6	10287.7	10150.7	-5.11964	-5.34584
195	10275.1	10301.4	10174.1	-5.14194	-5.37464
196	10290.9	10319.1	10195	-4.893	-5.1257
197	10307.9	10336.8	10212.2	-5.23676	-5.46946
198	10326.9	10353.7	10240.2	-5.12348	-5.35618
199	10345.3	10370.5	10289.4	-4.99353	-5.22623
200	10362.9	10387	10336.9	-5.19832	-5.43822
201	10380	10403.4	10360.4	-5.06551	-5.30541
202	10396.9	10420.1	10372	-5.17673	-5.41663
203	10414	10437.2	10388.3	-5.13883	-5.37873
204	10431.2	10454.1	10407.8	-5.20169	-5.44159
205	10448.5	10470.6	10426.1	-5.01795	-5.25785
206	10465.7	10488.8	10443	-4.70236	-4.95016
207	10482.8	10510.4	10459.4	-4.89935	-5.14715
208	10499.7	10533.2	10475.6	-5.02373	-5.27153
209	10516.5	10554.6	10491.7	-5.18145	-5.42925
210	10533.6	10575.6	10508	-5.16539	-5.41319
211	10551	10597.2	10524.8	-5.06037	-5.30817
212	10568.4	10618	10542	-5.2306	-5.4866
213	10585.4	10636.7	10559.3	-5.17405	-5.43005
214	10602.3	10653.6	10576	-5.12409	-5.38009
215	10619.5	10669.7	10591.8	-5.15297	-5.40897
216	10636.8	10685.8	10607.8	-5.03937	-5.29537
217	10653.9	10702.2	10625.3	-5.14667	-5.41197
218	10671	10718.5	10643.1	-4.99449	-5.25979
219	10688.3	10734.6	10660	-4.94841	-5.21371
220	10705.7	10750.9	10676.4	-5.03835	-5.30365
221	10722.9	10767.9	10693.2	-4.61103	-4.87633
222	10740	10785.1	10710	-4.84752	-5.11282
223	10757.4	10801.7	10726.5	-4.74088	-5.01588
224	10774.8	10818.1	10743	-4.93245	-5.20745
225	10792.2	10834.5	10751.6	-4.94813	-5.22313
226	10809.5	10850.7	10759.4	-4.78604	-5.06104
227	10826.5	10866.7	10766.2	-4.92254	-5.19754
228	10843.6	10882.7	10775.6	-5.01641	-5.29141
229	10860.8	10899.3	10788.8	-4.93127	-5.21647
230	10878	10916.2	10791.8	-4.9507	-5.2359
231	10895	10933.1	10791.8	-4.7318	-5.017
232	10911.8	10949.7	10791.8	-4.87227	-5.15747
233	10928.4	10966.1	10791.8	-4.89759	-5.18279
234	10944.7	10982.6	10794.4	-5.06832	-5.35352
235	10960.7	10999.8	10801	-4.97472	-5.27052
236	10976.5	11017.2	10809.9	-4.65065	-4.94645
237	10992.4	11034.2	10820.6	-5.06086	-5.35666
238	11008.5	11051.1	10832.3	-5.03577	-5.33157
239	11025.1	11068.3	10848	-4.81009	-5.10589
240	11041.9	11085.7	10873.6	-4.86714	-5.16294
241	11058.7	11103.4	10900.7	-4.53731	-4.84351
242	11075.5	11121.2	10928.3	-4.57017	-4.87637
243	11092.3	11139.2	10955.2	-4.70028	-5.00648
244	11109.2	11157.1	10982.3	-4.94249	-5.24869
245	11126.4	11175	11010.3	-4.80875	-5.11495
246	11143.7	11193	11038.6	-4.39019	-4.69639
247	11160.8	11211	11066.5	-4.65998	-4.97728
248	11178	11229	11093.8	-4.71321	-5.03051
249	11195.6	11246.9	11120.3	-4.72639	-5.04369
250	11213.6	11264.9	11144.5	-4.58763	-4.90493
251	11232.2	11283.4	11165.3	-4.57942	-4.89672
252	11251.2	11301.8	11183.1	-4.616	-4.9333
253	11270.4	11319.9	11198.8	-4.84171	-5.17031
254	11289.7	11339	11214	-4.98447	-5.31307
255	11309.3	11360.6	11230.1	-4.98114	-5.30974
256	11329.2	11383.9	11246.4	-4.95204	-5.28064
257	11349.7	11408.2	11262.8	-4.86628	-5.19488
258	11370.6	11433.6	11282	-4.84091	-5.18161
259	11391.8	11460.8	11306.2	-4.67535	-5.01605
260	11412.8	11488.9	11331.5	-4.52537	-4.86607
261	11433.4	11517	11354.1	-4.3088	-4.6495
262	11454.4	11544.6	11375.8	-4.52581	-4.87901
263	11476.2	11571.6	11398.9	-4.75772	-5.11092
264	11498.9	11598.1	11421.2	-4.59787	-4.95107
265	11521.9	11624.7	11440.6	-4.73477	-5.08797
266	11544.4	11650.9	11458.1	-4.89691	-5.25011
267	11565.7	11676.6	11475.5	-5.16459	-5.53089
268	11587.6	11702.6	11492.4	-5.0433	-5.4096
269	11611.6	11729.8	11508.7	-5.10945	-5.47575
270	11636.8	11757.9	11524.7	-5.02204	-5.38834
271	11662.4	11786.4	11540.8	-4.90485	-5.28405
272	11690.7	11815.6	11557.1	-5.04549	-5.42469
273	11724.1	11845.5	11573.7	-5.00418	-5.38338
274	11760.4	11875.6	11590.6	-5.31955	-5.71225
275	11796.8	11905.2	11608	-5.06975	-5.46245
276	11831.6	11935.2	11626	-4.79613	-5.18883
277	11864	11966.2	11644.7	-5.08257	-5.48847
278	11895.7	11997.9	11665.4	-5.03745	-5.44335
279	11928.3	12029.5	11688.8	-4.89138	-5.29728
280	11960.5	12061.4	11713	-4.98767	-5.40667
281	11990.9	12093.6	11739.7	-4.82749	-5.24649
282	12020.1	12124.4	11788.2	-5.17657	-5.59557
283	12049.1	12152.6	11871	-4.99652	-5.41552
284	12077.5	12180.5	11952.7	-5.05583	-5.48793
285	12105.1	12210.5	11998.6	-5.37638	-5.80848
286	12132.5	12242	12022.3	-4.89584	-5.32794
287	12160.1	12273.6	12044.8	-5.08116	-5.52626
288	12187.7	12304.9	12068.3	-5.19469	-5.63979
289	12214.7	12335.7	12090.9	-5.02486	-5.46996
290	12241.5	12366.9	12113.1	-5.07095	-5.51605
291	12268.8	12399	12135.7	-5.28997	-5.74817
292	12296.2	12431.2	12158.5	-5.02672	-5.48492
293	12323.5	12462.6	12181.2	-5.02172	-5.47992
294	12350.6	12493.5	12203.9	-5.03337	-5.49157
295	12377.5	12524.2	12226.7	-5.02008	-5.49138
296	12404.4	12555.3	12249.3	-4.99022	-5.46152
297	12431.4	12587.2	12271.2	-5.1435	-5.6148
298	12458.6	12619.6	12292.5	-5.07647	-5.56117
299	12486	12652.4	12313.8	-5.19435	-5.67905
300	12513.4	12685.8	12335.9	-4.9678	-5.4525
301	12540.8	12719.9	12359.3	-4.97355	-5.45825
302	12568.1	12753.7	12382.9	-4.82024	-5.31884
303	12595	12786.3	12405.3	-4.79589	-5.29449
304	12621.8	12818.2	12427.1	-4.80045	-5.29905
305	12648.6	12850.3	12448.9	-4.67206	-5.17066
306	12675.3	12882.8	12471.1	-4.87505	-5.38825
307	12702.1	12915.5	12493.5	-4.84332	-5.35652
308	12729	12948.1	12516.1	-4.56004	-5.07324
309	12756	12980.5	12539	-4.55626	-5.08476
310	12782.9	13012.6	12562.1	-4.63012	-5.15862

## Sheet: MEN5
depth (mm)	AGE BP	error_plus	error_minus	d18O	d18OIVcorrected
0	47.9138	121.895	-10.8633	-5.15575	-5.16885
1	57.9415	131.492	-0.491659	-5.38284	-5.39614
2	67.9171	140.719	9.87571	-5.5854	-5.5987
3	77.8354	150.088	20.2384	-5.76611	-5.77941
4	87.7296	159.56	30.5999	-5.62247	-5.63577
5	97.6306	168.994	40.9628	-5.47338	-5.48668
7	117.384	187.813	61.6821	-5.34277	-5.35607
8	127.256	197.211	72.0482	-5.62868	-5.64198
9	137.17	206.571	82.431	-5.58763	-5.60093
10	147.097	215.918	92.8153	-5.49479	-5.50809
11	157.004	225.282	103.185	-5.63836	-5.65206
12	166.906	234.645	113.545	-5.547	-5.5607
13	176.821	243.988	123.9	-5.70454	-5.71824
14	186.733	253.314	134.236	-5.50679	-5.52049
15	196.627	262.628	144.544	-5.42503	-5.43873
16	206.528	271.934	154.846	-5.56309	-5.57679
17	216.468	281.246	165.163	-5.57269	-5.58639
18	226.451	290.619	175.489	-5.41736	-5.43106
19	236.47	300.091	185.813	-5.54758	-5.56128
20	246.486	309.59	196.131	-5.49164	-5.50534
21	256.473	319.052	206.446	-5.52767	-5.54167
22	266.487	328.562	216.774	-5.32849	-5.34249
23	276.577	338.198	227.123	-5.02067	-5.03467
24	286.689	347.835	237.476	-5.18865	-5.20265
25	296.757	357.343	247.811	-5.1823	-5.1963
26	306.786	366.76	258.133	-5.11325	-5.12725
27	316.794	376.176	268.455	-5.19642	-5.21042
28	326.788	385.717	278.781	-5.29927	-5.31327
29	336.766	395.42	289.109	-5.4946	-5.5086
30	346.712	404.921	299.426	-5.19459	-5.20859
31	356.623	414.047	309.718	-4.96112	-4.97542
32	366.569	423.786	319.991	-5.12763	-5.14193
33	376.614	434.932	330.26	-5.06986	-5.08416
34	386.704	446.333	340.559	-5.33219	-5.34649
35	396.769	456.726	350.91	-5.11709	-5.13139
36	406.791	466.361	361.26	-5.45112	-5.46542
37	416.775	475.799	371.56	-5.633	-5.6473
38	426.774	485.32	381.841	-5.4205	-5.4348
39	436.829	495.044	392.141	-5.63208	-5.64638
40	446.885	504.73	402.454	-5.47903	-5.49333
41	456.885	514.145	412.767	-5.46025	-5.47495
42	466.866	523.443	423.077	-5.44883	-5.46353
43	476.868	532.82	433.385	-5.46444	-5.47914
44	486.861	542.259	443.699	-5.43568	-5.45038
45	496.814	551.697	454.025	-5.45099	-5.46569
46	506.759	561.092	464.357	-5.06273	-5.07743
47	516.74	570.435	474.69	-5.30828	-5.32298
48	526.783	579.823	485.025	-5.2314	-5.2461
49	536.886	589.329	495.362	-5.25442	-5.26912
50	546.95	598.817	505.679	-5.41246	-5.42716
51	556.909	608.155	515.957	-5.31972	-5.33462
52	566.912	617.423	526.226	-5.41395	-5.42885
53	577.09	626.73	536.515	-5.46405	-5.47895
54	587.284	636.077	546.815	-5.58704	-5.60194
55	597.327	645.433	557.108	-5.61248	-5.62738
56	607.304	654.726	567.395	-5.74952	-5.76442
57	617.33	663.956	577.682	-5.32829	-5.34319
58	627.388	673.44	587.968	-5.38318	-5.39808
59	637.439	683.384	598.252	-5.28152	-5.29642
60	647.483	693.22	608.533	-5.49364	-5.50854
61	657.516	702.495	618.811	-5.50932	-5.52462
62	667.477	711.969	629.089	-5.3555	-5.3708
63	677.329	722.332	639.371	-5.6668	-5.6821
64	687.202	732.766	649.649	-5.53973	-5.55503
65	697.214	742.395	659.916	-5.27224	-5.28754
66	707.275	751.62	670.179	-5.28761	-5.30291
67	717.274	761.007	680.443	-5.53513	-5.55043
68	727.228	770.51	690.699	-5.27378	-5.28908
69	737.177	779.973	700.945	-5.15547	-5.17077
70	747.127	789.401	711.218	-5.34945	-5.36475
71	757.071	798.833	721.554	-5.18088	-5.19658
72	766.989	808.277	731.933	-5.3922	-5.4079
73	776.874	817.729	742.334	-5.19039	-5.20609
74	786.768	827.172	752.774	-5.46992	-5.48562
75	796.708	836.59	763.254	-5.39666	-5.41236
76	806.66	845.978	773.681	-5.44513	-5.46083
77	816.577	855.337	783.976	-5.3552	-5.3709
78	826.449	864.686	794.207	-5.25424	-5.26994
79	836.288	874.037	804.461	-5.14635	-5.16205
80	846.158	883.367	814.746	-5.17876	-5.19446
81	856.111	892.654	825.041	-5.27859	-5.29479
82	866.093	901.926	835.283	-4.9368	-4.953
83	876.035	911.208	845.446	-5.152	-5.1682
84	885.936	920.473	855.685	-5.56113	-5.57733
85	895.81	929.696	866.117	-5.33396	-5.35016
86	905.684	938.911	876.512	-5.60547	-5.62167
87	915.578	948.164	886.669	-5.25081	-5.26701
88	925.479	957.493	896.824	-5.23341	-5.24961
89	935.373	966.928	907.194	-5.23986	-5.25606
90	945.251	976.456	917.494	-5.26879	-5.28499
91	955.115	986.057	927.455	-5.38753	-5.40423
92	964.973	995.705	937.397	-5.22171	-5.23841
93	974.839	1005.37	947.639	-5.26233	-5.27903
94	984.724	1014.96	957.906	-5.19127	-5.20797
95	994.637	1024.44	967.868	-5.30064	-5.31734
96	1004.56	1033.89	977.548	-5.48691	-5.50361
97	1014.46	1043.43	987.134	-5.57361	-5.59031
98	1024.35	1053.03	997.098	-5.42903	-5.44573
99	1034.21	1062.64	1007.5	-5.52376	-5.54046
100	1044.06	1072.22	1016.46	-5.15539	-5.17209
101	1053.91	1081.76	1022.74	-5.39649	-5.41369
102	1063.8	1091.32	1029.54	-5.39178	-5.40898
103	1073.77	1100.95	1039.73	-5.4394	-5.4566
104	1083.7	1110.54	1050.37	-5.37102	-5.38822
105	1093.49	1120.01	1057.67	-5.32234	-5.33954
106	1103.17	1129.51	1059.83	-5.28883	-5.30603
107	1112.81	1139.17	1059.83	-5.23179	-5.24899
108	1122.55	1148.91	1060.31	-5.30877	-5.32597
109	1132.47	1158.62	1068.13	-5.41864	-5.43584
110	1142.28	1168.19	1078.12	-5.44064	-5.45784
111	1151.76	1177.59	1084.93	-5.24138	-5.25858
112	1161.2	1186.94	1091.42	-5.39517	-5.41277
113	1170.9	1196.37	1101.16	-5.38558	-5.40318
114	1180.69	1205.94	1112.51	-5.64132	-5.65892
115	1190.34	1215.65	1123.18	-5.60997	-5.62757
116	1200	1225.28	1133.54	-5.55368	-5.57128
117	1209.85	1234.68	1144.35	-5.31127	-5.32887
118	1219.84	1244.11	1155.19	-5.22916	-5.24676
119	1229.83	1253.86	1165.57	-5.10378	-5.12138
120	1239.68	1263.65	1175.76	-5.23221	-5.24981
121	1249.34	1273.17	1186.14	-5.06336	-5.08096
122	1258.93	1282.53	1196.87	-5.12128	-5.13948
123	1268.63	1291.91	1207.91	-5.15469	-5.17289
124	1278.41	1301.45	1218.89	-5.23556	-5.25376
125	1288.24	1311.19	1229.52	-4.9298	-4.948
126	1297.99	1320.9	1240.1	-5.25087	-5.26907
127	1307.62	1330.39	1250.97	-5.03914	-5.05734
128	1317.25	1339.89	1261.95	-5.10852	-5.12672
129	1327.05	1349.62	1272.82	-5.25001	-5.26821
130	1336.93	1359.43	1283.58	-5.16882	-5.18702
131	1346.78	1369.16	1294.34	-5.02868	-5.04688
132	1356.59	1378.85	1305.19	-5.32708	-5.34568
133	1366.37	1388.61	1316.1	-5.16612	-5.18472
134	1376.12	1398.38	1326.66	-5.26004	-5.27864
135	1385.83	1408.08	1336.61	-5.27783	-5.29643
136	1395.56	1417.87	1346.66	-5.05208	-5.07068
137	1405.36	1427.88	1357.52	-5.43599	-5.45459
138	1415.22	1437.93	1368.68	-5.25142	-5.27002
139	1425.12	1447.86	1379.57	-5.42922	-5.44782
140	1434.98	1457.67	1390.41	-6.10066	-6.11926
141	1444.76	1467.41	1401.52	-5.4103	-5.4289
142	1454.52	1477.13	1412.72	-5.67015	-5.68945
143	1464.31	1486.89	1423.74	-5.69663	-5.71593
144	1474.2	1496.65	1434.55	-5.48346	-5.50276
145	1484.18	1506.43	1445.23	-5.52499	-5.54429
146	1494.17	1516.21	1455.9	-5.55059	-5.56989
147	1504.09	1526.03	1466.7	-5.4279	-5.4472
148	1514	1535.88	1477.53	-5.60515	-5.62445
149	1523.98	1545.77	1488.28	-5.12531	-5.14461
150	1533.94	1555.67	1499.02	-5.70344	-5.72274
151	1543.79	1565.58	1509.78	-5.08469	-5.10399
152	1553.59	1575.56	1520.55	-4.94969	-4.96899
153	1563.44	1585.68	1531.25	-5.22388	-5.24368
154	1573.35	1595.87	1541.91	-5.12328	-5.14308
155	1583.31	1606.05	1552.57	-5.19927	-5.21907
156	1593.32	1616.13	1563.24	-5.48384	-5.50364
157	1603.36	1626.08	1573.93	-5.43704	-5.45684
158	1613.42	1636.16	1584.62	-5.23164	-5.25144
159	1623.49	1646.52	1595.28	-5.22859	-5.24839
160	1633.59	1656.82	1605.95	-5.2418	-5.2616
161	1643.7	1666.7	1616.63	-5.04109	-5.06089
162	1653.78	1676.53	1627.26	-5.46614	-5.48594
163	1663.79	1686.68	1637.8	-5.26117	-5.28167
164	1673.83	1697	1648.32	-5.53142	-5.55192
165	1684	1707.26	1655.28	-5.33223	-5.35273
166	1694.23	1717.49	1660.59	-5.42051	-5.44101
167	1704.46	1727.73	1665.87	-5.58649	-5.60699
168	1714.65	1737.96	1671.01	-5.68076	-5.70126
169	1724.78	1748.12	1675.96	-4.96325	-4.98375
170	1734.79	1758.25	1681.02	-4.95885	-4.97935
171	1744.69	1768.4	1686.28	-5.08271	-5.10321
172	1754.7	1778.62	1690.64	-5.1989	-5.2199
173	1765.01	1788.94	1693.76	-5.31538	-5.33638
174	1775.31	1799.16	1699.64	-5.07897	-5.09997
175	1785.33	1809.13	1709.23	-4.99719	-5.01819
176	1795.21	1819.08	1709.23	-4.97163	-4.99263
177	1805.17	1829.22	1709.23	-5.36051	-5.38151
178	1815.22	1839.48	1709.23	-5.27068	-5.29168
179	1825.34	1849.69	1709.23	-5.14716	-5.16816
180	1835.45	1859.78	1717.49	-5.22332	-5.24432
181	1845.52	1869.69	1722.45	-5.21267	-5.23367
182	1855.42	1879.62	1725.42	-5.12233	-5.14393
183	1865.11	1889.71	1730.61	-5.22871	-5.25031
184	1874.82	1899.9	1737.39	-5.10478	-5.12638
185	1884.77	1910.08	1744.13	-5.51221	-5.53381
186	1894.82	1920.19	1750.01	-5.20283	-5.22443
187	1904.82	1930.23	1754.83	-5.36999	-5.39159
188	1914.81	1940.41	1759.98	-5.60175	-5.62335
189	1924.86	1950.87	1766.71	-5.0534	-5.075
190	1934.89	1961.17	1781.6	-5.45999	-5.48159
191	1944.8	1970.92	1795.94	-5.36615	-5.38775
192	1954.71	1980.59	1809.93	-5.2535	-5.2757
193	1964.73	1990.65	1824.22	-5.42891	-5.45111
194	1974.76	2000.74	1838.66	-5.33416	-5.35636
195	1984.69	2010.52	1852.96	-5.12017	-5.14237
196	1994.54	2020.51	1867.35	-5.09248	-5.11468
197	2004.4	2031.2	1882.09	-5.49344	-5.51564
198	2014.35	2042.11	1896.98	-5.41752	-5.43972
199	2024.44	2052.69	1911.74	-5.03703	-5.05923
200	2034.55	2063.09	1926.29	-5.20821	-5.23041
201	2044.57	2073.6	1940.61	-5.10732	-5.12952
202	2054.45	2084.26	1954.77	-5.30785	-5.33075
203	2064.23	2095.06	1968.94	-5.22975	-5.25265
204	2073.99	2105.93	1983.36	-4.78135	-4.80425
205	2083.84	2116.77	1998.24	-4.96946	-4.99236
206	2093.82	2127.49	2013.33	-5.65676	-5.67966
207	2103.98	2138.06	2028.34	-5.64648	-5.66938
208	2114.28	2148.68	2043.19	-5.53114	-5.55404
209	2124.68	2159.53	2057.85	-5.90948	-5.93238
210	2135.08	2170.53	2072.49	-5.12991	-5.15281
211	2145.44	2181.55	2087.26	-5.51939	-5.54229
212	2155.76	2192.51	2102.06	-5.51835	-5.54185
213	2166.09	2203.39	2116.69	-5.40056	-5.42406
214	2176.64	2214.16	2130.97	-5.6437	-5.6672
215	2187.57	2224.84	2144.67	-5.56164	-5.58514
216	2198.83	2235.5	2157.65	-5.53068	-5.55418
217	2210.32	2246.2	2169.9	-5.4492	-5.4727
218	2221.94	2256.91	2181.96	-5.24108	-5.26458
219	2233.59	2267.6	2194.29	-5.59562	-5.61912
220	2245.31	2278.44	2206.39	-5.3228	-5.3463
221	2257.14	2289.58	2217.72	-5.26897	-5.29307
222	2269.16	2300.96	2228.69	-5.37443	-5.39853
223	2281.38	2312.52	2239.73	-5.38053	-5.40463
224	2293.6	2324.34	2250.5	-5.50103	-5.52513
225	2305.69	2336.47	2260.91	-5.52406	-5.54816
226	2317.94	2348.73	2272.73	-5.59005	-5.61415
227	2330.63	2360.95	2287.33	-5.46118	-5.48528
228	2343.43	2373.29	2302.77	-5.41195	-5.43605
229	2356.16	2385.98	2316.86	-5.48207	-5.50697
230	2369.72	2399.12	2329.67	-5.76589	-5.79079
231	2384.77	2412.75	2341.93	-5.63704	-5.66194
232	2399.91	2426.6	2353.35	-5.44096	-5.46586
233	2413.73	2440.42	2359.54	-5.85895	-5.88385
234	2426.82	2454.33	2361.2	-5.63266	-5.65756
235	2439.61	2468.41	2361.2	-5.63485	-5.65975
236	2449.99	2482.16	2361.2	-5.33213	-5.35703
237	2455.3	2495.2	2367.34	-5.37044	-5.39594
238	2455.79	2508.27	2387	-5.52503	-5.55053
239	2456.95	2522.08	2407.53	-5.52778	-5.55328
240	2458.1	2536.11	2426.27	-5.1117	-5.1372
241	2472.91	2549.75	2446.11	-5.40909	-5.43459
242	2493.8	2563.18	2466.86	-5.06467	-5.09017
244	2533.44	2590.61	2508.39	-5.39218	-5.41768
245	2553.36	2604.9	2528.82	-5.49155	-5.51705
246	2573.68	2619.46	2549.22	-5.41197	-5.43817
247	2593.99	2634.12	2569.83	-5.11216	-5.13836
248	2613.99	2648.77	2590.56	-5.11153	-5.13773
249	2633.5	2663.4	2611.27	-5.25684	-5.28304
250	2652.71	2678.37	2631.71	-5.37725	-5.40345
251	2671.87	2694.16	2651.47	-5.1371	-5.1639
252	2691.09	2711.34	2669.55	-5.20702	-5.23382
253	2710.44	2730.24	2685.22	-5.43262	-5.45942
254	2729.98	2750.01	2699.27	-5.15996	-5.18676
255	2749.78	2769.77	2712.8	-5.66396	-5.69076
256	2769.97	2789.76	2726.54	-5.47636	-5.50406
257	2790.6	2810.29	2740.99	-5.36626	-5.39396
258	2811.43	2831.05	2756.18	-5.30852	-5.33622
259	2832.19	2851.63	2771.94	-5.45223	-5.47993
260	2853.03	2872.02	2787.85	-5.1271	-5.1548
261	2874.09	2892.29	2804.62	-5.19288	-5.22128
262	2895.11	2912.54	2827.88	-5.40592	-5.43432
263	2915.8	2932.87	2861.32	-5.37593	-5.40433
264	2936.27	2953.34	2896.02	-5.77331	-5.80171
265	2956.71	2973.97	2922.97	-5.36987	-5.39917
266	2977.16	2994.63	2945.48	-5.67547	-5.70477
267	2997.62	3015.19	2968.4	-5.73242	-5.76172
268	3018.04	3035.64	2990.45	-5.57638	-5.60568
269	3038.4	3056.01	3009.77	-5.65062	-5.67992
270	3058.72	3076.31	3028.09	-5.51926	-5.54946
271	3079.04	3096.59	3047.45	-5.44879	-5.47899
272	3099.36	3116.97	3067.46	-5.82312	-5.85332
273	3119.71	3137.51	3087.36	-5.72258	-5.75278
274	3140.04	3157.96	3107.46	-5.17877	-5.20897
275	3160.35	3178.11	3128.14	-5.28309	-5.31409
276	3180.68	3198.39	3149.13	-5.11926	-5.15026
277	3201.09	3219.15	3170.03	-5.15176	-5.18276
278	3221.56	3239.99	3190.84	-5.26734	-5.29834
279	3242.05	3260.43	3211.61	-5.11359	-5.14459
280	3262.52	3280.63	3232.31	-5.16326	-5.19506
281	3282.94	3300.85	3252.9	-5.13482	-5.16662
282	3303.33	3321.19	3273.53	-5.31039	-5.34219
283	3323.75	3341.66	3294.34	-5.16166	-5.19346
284	3344.2	3362.2	3315.23	-5.33474	-5.36654
285	3364.66	3382.71	3336.06	-5.15846	-5.19116
286	3385.12	3403.15	3356.85	-5.28816	-5.32086
287	3405.55	3423.53	3377.63	-5.33286	-5.36556
288	3425.99	3443.88	3398.45	-5.15283	-5.18553
289	3446.44	3464.24	3419.37	-5.54808	-5.58078
290	3466.9	3484.65	3440.32	-5.76632	-5.79992
291	3487.38	3505.13	3461.24	-5.47524	-5.50884
292	3507.84	3525.7	3482.12	-5.57934	-5.61294
293	3528.29	3546.4	3502.99	-5.45779	-5.49139
294	3548.73	3567.05	3523.89	-5.31407	-5.34767
295	3569.18	3587.54	3544.84	-5.18738	-5.22168
296	3589.69	3608	3565.74	-5.35218	-5.38648
297	3610.27	3628.62	3586.5	-5.3961	-5.4304
298	3630.86	3649.47	3607.16	-5.08082	-5.11512
299	3651.38	3670.79	3627.78	-5.23755	-5.27185
300	3671.9	3693.31	3648.47	-5.21691	-5.25201
301	3692.47	3717.64	3669.32	-5.35771	-5.39281
302	3713.03	3743.27	3690.33	-5.20811	-5.24321
303	3733.51	3769.36	3711.39	-5.35969	-5.39479
304	3754.02	3794.86	3732.3	-5.51153	-5.54743
305	3774.63	3818.92	3752.91	-5.09614	-5.13204
306	3795.29	3841.66	3773.43	-5.21603	-5.25193
307	3815.92	3863.45	3794.1	-5.61844	-5.65434
308	3836.5	3884.63	3814.84	-5.24503	-5.28093
309	3857.05	3905.61	3835.5	-5.48116	-5.51786
310	3877.61	3926.85	3856.06	-5.4979	-5.5346
311	3898.2	3948.63	3876.55	-5.41564	-5.45234
312	3918.81	3970.3	3897.13	-5.54053	-5.57723
313	3939.39	3991.19	3917.95	-5.83946	-5.87616
314	3959.96	4011.43	3938.83	-5.72942	-5.76702
315	3980.52	4031.4	3959.58	-5.63131	-5.66891
316	4001.08	4051.47	3980.24	-5.27131	-5.30891
317	4021.64	4071.88	4000.86	-5.39318	-5.43078
318	4042.2	4092.27	4021.38	-5.13066	-5.16826
319	4062.76	4112.26	4041.75	-5.71755	-5.75615
320	4083.3	4131.98	4062.16	-5.50251	-5.54111
321	4103.8	4151.68	4082.75	-5.33404	-5.37264
322	4124.27	4171.65	4103.36	-5.54152	-5.58012
323	4144.73	4192.01	4123.81	-5.40093	-5.43953
325	4185.69	4231.85	4164.47	-5.24193	-5.28143
327	4226.61	4270.97	4205.49	-5.26605	-5.30555
328	4247.05	4290.87	4226.21	-5.03031	-5.06981
329	4267.52	4310.77	4246.91	-4.99519	-5.03559
330	4288	4330.73	4267.53	-5.16617	-5.20657
331	4308.45	4350.75	4288.01	-5.54115	-5.58155
332	4328.92	4370.63	4308.36	-5.31427	-5.35467
333	4349.43	4390.15	4328.65	-5.48501	-5.52541
334	4369.92	4409.6	4349.02	-5.41569	-5.45689
335	4390.35	4429.26	4369.59	-5.24514	-5.28634
336	4410.78	4449.19	4390.15	-5.28922	-5.33042
337	4431.3	4469.26	4410.49	-5.27424	-5.31544
338	4451.84	4489.09	4430.79	-5.16756	-5.20876
339	4472.33	4508.45	4451.22	-4.96509	-5.00729
340	4492.79	4528	4471.8	-4.93325	-4.97545
341	4513.26	4548.32	4492.45	-5.0284	-5.0706
342	4533.75	4568.82	4513.09	-5.28995	-5.33215
343	4554.25	4588.84	4533.72	-5.1109	-5.1539
344	4574.73	4608.76	4554.55	-5.23292	-5.27592
345	4595.15	4628.99	4575.74	-5.3818	-5.4248
346	4615.55	4649.2	4596.88	-5.26242	-5.30542
347	4635.94	4669.01	4617.57	-5.25993	-5.30293
348	4656.34	4688.58	4638.06	-5.23	-5.274
349	4676.77	4708.15	4658.66	-5.27642	-5.32042
350	4697.27	4727.73	4679.3	-5.1738	-5.2178
351	4717.84	4747.27	4699.84	-5.3178	-5.3618
352	4738.4	4766.8	4720.28	-5.00853	-5.05253
353	4758.89	4786.37	4740.69	-5.35925	-5.40435
354	4779.34	4806.04	4761.14	-5.33747	-5.38257
355	4799.81	4825.91	4781.65	-5.34433	-5.38943
356	4820.28	4846.03	4802.15	-5.3968	-5.4419
357	4840.72	4866.43	4822.55	-5.62983	-5.67493
358	4861.15	4886.95	4842.9	-5.40112	-5.44732
359	4881.59	4907.41	4863.27	-5.16219	-5.20839
360	4902.06	4927.71	4883.63	-5.27394	-5.32014
361	4922.56	4947.78	4903.98	-5.388	-5.4342
362	4943.06	4967.81	4924.33	-5.44353	-5.48973
363	4963.54	4987.96	4944.71	-5.02779	-5.07569
364	4983.99	5008.3	4965.12	-5.14085	-5.18875
365	5004.42	5028.81	4985.55	-5.2202	-5.2681
366	5024.85	5049.5	5005.98	-5.21213	-5.26003
367	5045.29	5070.3	5026.4	-5.10779	-5.15569
368	5065.71	5090.88	5046.8	-5.15894	-5.20834
369	5086.06	5111.02	5067.17	-5.0832	-5.1326
370	5106.38	5131.23	5087.51	-5.30815	-5.35755
371	5126.72	5151.98	5107.81	-5.20597	-5.25537
372	5147.07	5172.93	5128.1	-5.27448	-5.32388
373	5167.43	5193.65	5148.41	-5.32683	-5.37783
374	5187.83	5214.27	5168.67	-5.37	-5.421
375	5208.29	5234.98	5188.88	-5.36689	-5.41789
376	5228.72	5255.79	5209.15	-5.39098	-5.44198
377	5249.03	5276.63	5229.6	-5.36819	-5.41919
378	5269.3	5297.43	5250.03	-5.48437	-5.53717
379	5289.64	5318.16	5270.29	-5.2839	-5.3367
380	5309.99	5338.89	5290.47	-5.40673	-5.45953
381	5330.3	5359.72	5310.73	-5.51647	-5.56927
382	5350.61	5380.6	5331.02	-5.74004	-5.79284
383	5370.93	5401.51	5351.27	-5.37798	-5.43268
384	5391.24	5422.45	5371.52	-5.42778	-5.48248
385	5411.5	5443.45	5391.79	-5.35714	-5.41184
386	5431.77	5464.41	5412.09	-5.26462	-5.31932
387	5452.1	5485.3	5432.43	-5.26257	-5.31727
388	5472.52	5506.21	5452.74	-5.12138	-5.17818
389	5492.99	5527.24	5472.93	-5.33085	-5.38765
390	5513.44	5548.32	5492.98	-5.31497	-5.37177
391	5533.8	5569.43	5512.9	-5.33734	-5.39414
392	5554.11	5590.94	5532.82	-5.34774	-5.40664
393	5574.43	5613.13	5552.87	-5.15066	-5.20956
394	5594.79	5635.62	5573.01	-5.18365	-5.24255
395	5615.18	5657.95	5593.15	-5.32702	-5.38592
396	5635.61	5680.08	5613.27	-5.21532	-5.27422
397	5656.11	5702.01	5633.37	-5.13696	-5.19786
398	5676.63	5723.65	5653.48	-4.92406	-4.98496
399	5697.13	5744.87	5673.64	-5.17404	-5.23494
400	5717.58	5765.51	5693.82	-4.9718	-5.0327
401	5737.97	5785.56	5714	-5.07226	-5.13316
402	5758.31	5805.55	5734.08	-5.19991	-5.26301
403	5778.62	5825.91	5754.01	-5.2929	-5.356
404	5798.91	5846.07	5773.95	-5.07442	-5.13752
405	5819.18	5865.42	5794.09	-5.37288	-5.43598
406	5839.29	5884.3	5814.31	-5.39582	-5.45892
407	5859.18	5903.18	5834.38	-5.12295	-5.18815
408	5878.96	5922.15	5853.94	-4.98827	-5.05347
409	5898.76	5941.28	5872.71	-5.26005	-5.32525
410	5918.5	5960.79	5891.02	-5.30189	-5.36709
411	5938.08	5980.84	5909.29	-5.06704	-5.13224
412	5957.6	6001.23	5927.54	-5.24024	-5.30764
413	5977.15	6021.66	5945.69	-5.17003	-5.23743
414	5996.62	6041.71	5963.58	-5.38688	-5.45428
415	6015.93	6061.28	5981.05	-5.47742	-5.54482
416	6035.39	6081.7	5998.12	-5.46638	-5.53378
417	6055.23	6103.32	6014.9	-5.65365	-5.72335
418	6074.98	6121.39	6031.61	-5.44765	-5.51735
419	6094.13	6132.37	6048.42	-5.24494	-5.31464
421	6131.72	6159.26	6081.76	-5.27418	-5.34388
422	6150.98	6179.69	6098.22	-5.24054	-5.31024
423	6170.95	6200.36	6114.68	-5.48179	-5.55369
424	6191.24	6220.82	6131.21	-5.6411	-5.713
425	6211.43	6241.35	6147.85	-5.35972	-5.43162
426	6231.6	6261.88	6164.64	-5.38493	-5.45683
427	6251.91	6282.33	6181.56	-5.28495	-5.35685
428	6272.27	6302.81	6198.5	-5.11416	-5.18796
429	6292.56	6323.44	6215.32	-5.39348	-5.46728
430	6312.7	6344.02	6232.13	-5.41026	-5.48406
431	6332.7	6364.38	6249	-5.46696	-5.54076
432	6352.77	6384.61	6265.73	-5.37047	-5.44427
433	6372.95	6404.87	6282.18	-5.49195	-5.56765
434	6392.2	6425.05	6298.53	-5.50661	-5.58231
435	6410.09	6445.04	6314.97	-5.63855	-5.71425
436	6429.67	6464.93	6331.43	-5.65069	-5.72639
437	6445.45	6484.86	6347.76	-5.41802	-5.49372
438	6450.97	6505.08	6363.96	-5.55724	-5.63294
439	6451	6515.45	6380.04	-5.38213	-5.45783
440	6451.04	6523.61	6396.02	-5.25839	-5.33409
441	6451.08	6527.61	6411.9	-5.39086	-5.46656
442	6456.54	6527.61	6427.88	-5.3031	-5.381
443	6465.09	6527.61	6444.11	-5.70359	-5.78149
444	6481.06	6527.61	6460.5	-5.50441	-5.58231
445	6497.62	6532.71	6476.91	-5.87473	-5.95263
446	6514.25	6544.04	6493.38	-5.6488	-5.7267
447	6530.64	6557.07	6509.96	-5.50101	-5.57891
448	6547.07	6572.64	6526.64	-5.48664	-5.56454
449	6563.79	6589.72	6543.36	-5.59429	-5.67429
450	6580.61	6606.11	6559.95	-5.4432	-5.5232
451	6597.3	6621.27	6576.28	-5.64273	-5.72273
452	6614.07	6647.76	6592.68	-5.53957	-5.61957
453	6631.09	6694.16	6609.45	-5.97513	-6.05513
454	6648.12	6740.1	6626.37	-5.97583	-6.05583
455	6664.93	6765.33	6643.17	-5.79821	-5.88001
456	6681.74	6779.05	6659.82	-5.71214	-5.79394
457	6698.82	6794.59	6676.36	-5.74256	-5.82436
458	6716.36	6812.22	6692.93	-5.74832	-5.83012
459	6734.35	6829.41	6709.62	-5.74002	-5.82182
460	6752.22	6845.45	6726.16	-5.69414	-5.77804
461	6769.59	6860.25	6742.39	-5.62747	-5.71137
462	6787.4	6874.58	6758.75	-5.66998	-5.75388
463	6806.43	6889.12	6775.63	-6.07669	-6.16059
464	6825.72	6903.37	6792.61	-5.81094	-5.89484
465	6844.16	6916.82	6809.23	-5.91235	-5.99625
466	6862	6930.01	6825.59	-5.44987	-5.53577
467	6879.64	6943.53	6841.87	-5.52916	-5.61506
468	6896.72	6957.1	6858.15	-5.85092	-5.93682
469	6912.95	6970.35	6874.42	-5.72862	-5.81452
470	6928.95	6983.4	6890.7	-5.60187	-5.68777
471	6945.3	6996.5	6907.01	-5.80497	-5.89087
472	6961.58	7009.66	6923.28	-5.86812	-5.95592
473	6977.27	7022.86	6939.45	-6.12562	-6.21342
474	6992.59	7036.09	6955.47	-6.33356	-6.42136
475	7007.84	7049.33	6971.34	-5.72965	-5.81745
476	7023.16	7062.68	6987.19	-5.62837	-5.71617
477	7038.58	7076.22	7003.17	-6.14589	-6.23369
478	7053.87	7089.98	7019.28	-5.52613	-5.61613
479	7068.91	7103.95	7035.46	-5.77437	-5.86437
480	7083.96	7118.12	7051.33	-5.64277	-5.73277
481	7099.28	7132.48	7066.62	-5.86126	-5.95126
482	7114.6	7147.11	7081.85	-5.71857	-5.80857
483	7129.61	7162.13	7097.49	-5.83756	-5.92756
484	7144.48	7177.83	7113.1	-5.55808	-5.64808
485	7159.39	7194.41	7128.15	-5.848	-5.9399
486	7174.31	7211.35	7142.76	-5.94538	-6.03728
487	7189.15	7228.17	7157.14	-5.57358	-5.66548
488	7203.92	7244.99	7171.38	-5.59991	-5.69181
489	7218.67	7262.05	7185.49	-5.73347	-5.82537
490	7233.19	7279.16	7199.39	-5.72337	-5.81527
491	7247.34	7296.13	7213.04	-5.54976	-5.64166
492	7261.26	7313	7226.68	-5.52748	-5.62148
493	7275.11	7329.82	7240.52	-5.44564	-5.53964
494	7288.83	7346.48	7254.31	-5.55745	-5.65145
495	7302.35	7362.95	7267.78	-5.77191	-5.86591
496	7315.64	7379.52	7281.16	-5.69226	-5.78626
497	7328.72	7396.5	7294.7	-5.68533	-5.77933
498	7341.72	7413.87	7308.35	-5.57856	-5.67256
499	7354.73	7431.26	7322	-5.38124	-5.47764
500	7367.51	7447.29	7335.62	-5.51582	-5.61222
501	7379.88	7460.98	7349.24	-5.26732	-5.36372
502	7392.3	7473.95	7362.81	-5.6249	-5.7213
503	7405.2	7487.54	7376.34	-5.38296	-5.47936
504	7418.09	7499.48	7389.95	-5.58739	-5.68379
505	7430.55	7508.03	7403.72	-5.78153	-5.87793
506	7443.05	7517.14	7417.51	-5.34985	-5.44625
507	7456.12	7528.79	7431.19	-5.53516	-5.63366
508	7469.51	7532.46	7444.85	-5.70894	-5.80744
509	7482.88	7532.46	7458.6	-5.55261	-5.65111
510	7496.22	7532.46	7472.31	-5.485	-5.5835
511	7509.66	7535.79	7485.83	-5.64826	-5.74676
512	7523.23	7548.38	7499.16	-5.63128	-5.72978
513	7536.95	7562.27	7512.32	-5.45526	-5.55376
514	7550.63	7575.68	7525.47	-5.7023	-5.8008
515	7564.12	7589.22	7538.74	-5.54456	-5.64556
516	7577.59	7602.99	7552.12	-5.64828	-5.74928
517	7591.2	7616.93	7565.56	-5.48996	-5.59096
518	7604.87	7630.88	7579.07	-5.2058	-5.3068
519	7618.46	7644.7	7592.67	-5.71947	-5.82047
520	7632.01	7658.53	7606.38	-5.6996	-5.8006
521	7645.56	7672.51	7620.17	-5.78142	-5.88242
522	7659.09	7686.58	7633.83	-5.77305	-5.87665
523	7672.58	7700.62	7647.17	-5.40688	-5.51048
524	7686.08	7714.63	7660.35	-5.35824	-5.46184
525	7699.65	7728.59	7673.55	-5.20107	-5.30467
526	7713.27	7742.48	7686.85	-5.23146	-5.33506
527	7726.91	7756.26	7700.27	-5.11537	-5.21897
528	7740.5	7770	7713.69	-5.43379	-5.53739
529	7753.98	7783.81	7727	-5.45296	-5.55886
530	7767.45	7797.69	7740.24	-5.87808	-5.98398
531	7781.04	7811.65	7753.49	-5.60155	-5.70745
532	7794.76	7825.65	7766.79	-5.43216	-5.53806
533	7808.58	7839.64	7780.15	-5.57874	-5.68464
534	7822.29	7853.64	7793.52	-5.59068	-5.69658
535	7835.74	7867.67	7806.85	-5.71129	-5.81719
536	7849.2	7881.73	7820.16	-5.86845	-5.97435
537	7862.93	7895.81	7833.48	-5.78931	-5.89781
538	7876.71	7909.83	7846.8	-5.68286	-5.79136
539	7890.29	7923.75	7860.14	-6.02925	-6.13775
540	7903.77	7937.63	7873.53	-5.67661	-5.78511
541	7917.3	7951.54	7886.98	-5.67768	-5.78618
542	7930.85	7965.48	7900.46	-5.6892	-5.7977
543	7944.37	7979.41	7913.91	-5.58659	-5.69509
544	7957.86	7993.33	7927.34	-5.61729	-5.72869
545	7971.33	8007.25	7940.78	-5.50777	-5.61917
546	7984.81	8021.18	7954.22	-5.63339	-5.74479
547	7998.34	8035.12	7967.66	-5.68963	-5.80103
548	8011.83	8049.06	7981.1	-5.48212	-5.59352
549	8025.23	8062.96	7994.54	-5.43672	-5.54812
550	8038.62	8076.83	8007.93	-5.27432	-5.38572
551	8052.09	8090.68	8021.24	-5.64623	-5.75763
552	8065.68	8104.52	8034.5	-5.66213	-5.77653
553	8079.39	8118.36	8047.75	-5.51987	-5.63427
554	8093.07	8132.18	8060.98	-5.83562	-5.95002
556	8120.15	8159.79	8087.25	-6.0469	-6.1613
557	8133.76	8173.68	8100.23	-5.94336	-6.05776
558	8147.42	8187.61	8113.13	-6.09344	-6.20784
559	8161.07	8201.54	8126	-6.04019	-6.15789
560	8174.7	8215.46	8138.87	-5.53224	-5.64994
561	8188.34	8229.38	8151.76	-5.2912	-5.4089
562	8201.98	8243.31	8164.7	-5.48008	-5.59778
563	8215.59	8257.24	8177.7	-5.49305	-5.61075
564	8229.15	8271.16	8190.71	-5.46251	-5.58021
565	8242.66	8285.06	8203.68	-5.55972	-5.67742
566	8256.16	8299.06	8216.68	-6.14804	-6.26894
567	8269.7	8313.23	8229.77	-5.83581	-5.95671
568	8283.32	8327.48	8242.87	-5.88523	-6.00613
569	8297.02	8341.7	8255.87	-5.88737	-6.00827
570	8310.71	8355.9	8268.78	-5.52414	-5.64504
571	8324.29	8370.1	8281.6	-5.4555	-5.5764
572	8337.85	8384.32	8294.36	-5.65111	-5.77201
573	8351.5	8398.53	8307.09	-5.58976	-5.71066
574	8365.19	8412.73	8319.93	-5.13821	-5.26291
575	8378.86	8426.94	8333	-5.45043	-5.57513
576	8392.5	8441.15	8346.18	-5.58882	-5.71352
577	8406.11	8455.36	8359.32	-5.42102	-5.54572
578	8419.69	8469.57	8372.37	-5.66966	-5.79436
579	8433.24	8483.78	8385.34	-5.6685	-5.7932
580	8446.79	8497.99	8398.26	-5.63376	-5.75846
581	8460.36	8512.2	8411.21	-5.48533	-5.61353
582	8473.95	8526.41	8424.16	-5.74862	-5.87682
583	8487.53	8540.63	8437.1	-5.55113	-5.67933
584	8501.07	8554.84	8450.04	-5.42756	-5.55576
585	8514.55	8569.06	8462.97	-5.37202	-5.50022
586	8527.99	8583.28	8475.92	-5.60151	-5.72971
587	8541.46	8597.5	8488.86	-5.63919	-5.76739
588	8555	8611.72	8501.8	-5.29949	-5.43149
589	8568.66	8625.94	8514.74	-5.36072	-5.49272
590	8582.35	8640.16	8527.68	-5.23676	-5.36876
591	8595.98	8654.38	8540.62	-5.16202	-5.29402
592	8609.57	8668.6	8553.56	-5.29614	-5.42814
593	8623.17	8682.82	8566.5	-5.48238	-5.61438
594	8636.74	8697.04	8579.44	-5.57311	-5.70511
595	8650.27	8711.26	8592.38	-5.46693	-5.59893
596	8663.82	8725.48	8605.32	-5.67276	-5.80896
597	8677.44	8739.72	8618.26	-5.52716	-5.66336
598	8691.05	8753.98	8631.2	-5.26593	-5.40213
599	8704.57	8768.27	8644.14	-5.48818	-5.62438
600	8718.16	8782.56	8657.08	-5.86246	-5.99866
601	8731.91	8796.86	8670.02	-5.54402	-5.68022
602	8745.63	8811.15	8682.96	-5.40949	-5.54569
603	8759.13	8825.43	8695.9	-5.44494	-5.58544
604	8772.56	8839.7	8708.84	-5.34866	-5.48916
605	8786.07	8853.92	8721.77	-5.36819	-5.50869
606	8799.61	8868.12	8734.72	-5.17829	-5.31879
607	8813.1	8882.33	8747.66	-5.74434	-5.88484
608	8826.54	8896.55	8760.6	-5.62028	-5.76078
609	8839.94	8910.79	8773.5	-5.45746	-5.59796
610	8853.45	8925.04	8786.4	-5.22242	-5.36762

## Sheet: OST2
depth	Age BP	error_plus	error_minus	d18O	d18OIVcorrected
45	10812.5	10850.2	10770.5	-4.69141	-4.96641
45.3	10822.9	10860	10781.5	-3.76554	-4.04054
45.6	10833.2	10869.7	10792.6	-3.56542	-3.84042
45.9	10843.4	10879.5	10803.6	-3.33231	-3.60731
46.2	10853.6	10889.3	10814.6	-3.53405	-3.80905
46.5	10863.8	10899	10825.6	-3.57017	-3.84517
46.8	10873.9	10908.8	10836.6	-3.71929	-3.99429
47.1	10884	10918.6	10847.5	-3.7214	-3.9964
47.4	10894.1	10928.4	10858.4	-3.85104	-4.12604
47.7	10904.2	10938.2	10869.3	-3.92334	-4.20854
48	10914.3	10948	10880.1	-4.10298	-4.38818
48.3	10924.4	10957.8	10891	-3.92593	-4.21113
48.6	10934.5	10967.6	10901.8	-3.74633	-4.03153
48.9	10944.7	10977.5	10912.6	-3.52572	-3.81092
49.2	10954.8	10987.4	10923.4	-3.82042	-4.10562
49.5	10965.1	10997.3	10934.2	-3.60705	-3.89225
49.8	10975.3	11007.2	10945	-3.89276	-4.17796
50.1	10985.6	11017.1	10955.8	-3.8094	-4.0946
50.4	10995.8	11027	10966.7	-3.67545	-3.97125
50.7	11006.1	11036.9	10977.5	-3.65565	-3.95145
51	11016.5	11046.9	10988.4	-3.84238	-4.13818
51.3	11026.8	11056.8	10999.3	-3.54035	-3.83615
51.6	11037.1	11066.7	11010.3	-3.69794	-3.99374
51.9	11047.4	11076.7	11021.2	-3.77474	-4.07054
52.2	11057.8	11086.7	11032.1	-3.85754	-4.15334
52.5	11068.2	11096.7	11042.9	-3.90175	-4.19755
52.8	11078.5	11106.7	11053.7	-3.61851	-3.91431
53.1	11088.9	11116.7	11064.4	-3.71211	-4.00791
53.4	11099.3	11126.8	11075	-3.65649	-3.96269
53.7	11109.7	11136.9	11085.5	-3.85199	-4.15819
54.3	11130.5	11156.9	11106.3	-3.58612	-3.89232
54.6	11140.9	11166.9	11116.7	-3.55866	-3.86486
54.9	11151.3	11176.7	11127.2	-3.52335	-3.82955
55.2	11161.6	11186.4	11137.7	-3.46927	-3.77547
55.5	11171.9	11196	11148.2	-3.39953	-3.70573
55.8	11182.1	11205.6	11158.7	-3.45355	-3.75975
56.1	11192.3	11215.4	11169.2	-3.61849	-3.92469
56.4	11202.5	11225.4	11179.8	-3.51483	-3.83213
56.7	11212.7	11235.7	11190.3	-3.48896	-3.80626
57	11222.8	11246.5	11200.8	-3.6883	-4.0056
57.3	11232.9	11257.6	11211.3	-3.68452	-4.00182
57.6	11243.1	11269	11221.7	-3.57719	-3.89449
57.9	11253.2	11280.2	11232.1	-3.44804	-3.76534
58.2	11263.5	11290.8	11242.4	-3.45438	-3.77168
58.5	11273.8	11300.6	11252.7	-3.55881	-3.87611
58.8	11284.2	11309.1	11263	-3.1021	-3.4194
59.1	11294.8	11316.1	11273.2	-3.08117	-3.39847
59.4	11305.6	11321.8	11283.5	-3.18633	-3.51493
59.7	11316.3	11327.5	11293.7	-3.21576	-3.54436
60	11326.9	11334.6	11303.8	-3.24462	-3.57322
60.3	11337.3	11344.5	11314	-3.20401	-3.53261
60.6	11347.3	11358.6	11324.1	-3.27187	-3.60047
60.9	11356.7	11378.1	11334.3	-3.4966	-3.8252
61.2	11365.6	11404.4	11344.4	-3.6902	-4.0188
61.5	11374.2	11436.5	11354.5	-3.84838	-4.17698
61.8	11383.1	11472.1	11364.6	-3.70147	-4.03007
62.1	11392.9	11508.7	11374.7	-3.68801	-4.01661
62.4	11404.3	11544	11385	-3.75431	-4.09501
62.7	11417.7	11575.8	11395.3	-3.69481	-4.03551
63	11434	11601.6	11405.7	-3.76239	-4.10309
63.3	11453.2	11619.7	11416.2	-3.88565	-4.22635
63.6	11474.7	11631	11426.9	-3.91598	-4.25668
63.9	11497	11635.2	11437.6	-4.0468	-4.4
64.2	11519.1	11636.1	11448.4	-3.93599	-4.28919
64.5	11539.7	11636.1	11459.2	-3.69534	-4.04854
64.8	11557.6	11636.1	11470	-3.38999	-3.74319
65.1	11571.6	11636.1	11480.9	-3.50072	-3.85392
65.4	11581.3	11636.1	11491.6	-3.36297	-3.71617
65.7	11587.6	11636.3	11502.3	-3.40488	-3.75808
66	11591.3	11636.9	11512.8	-3.6147	-3.9679
66.3	11593.3	11637.8	11523.1	-3.74076	-4.09396
66.6	11594.6	11639.1	11533.2	-3.77671	-4.12991
66.9	11596.1	11641.4	11543	-3.62797	-3.98117
67.2	11598.6	11643.6	11552.4	-3.75306	-4.11936
67.5	11602.2	11645.8	11561.4	-3.83321	-4.19951
67.8	11606.6	11648	11569.7	-3.89706	-4.26336
68.1	11611.4	11650.5	11577.3	-3.87387	-4.24017
68.4	11616.4	11653.4	11584	-3.75098	-4.11728
68.7	11621	11656.9	11589.6	-3.81264	-4.17894
69	11625.1	11661	11594	-3.91844	-4.28474
69.3	11628.2	11665.8	11597.1	-3.78494	-4.15124
69.6	11630.6	11671.1	11599.2	-3.918	-4.2843
69.9	11632.5	11676.3	11600.6	-3.9392	-4.3055
70.2	11634	11681.3	11601.6	-3.85074	-4.21704
70.5	11635.4	11683.7	11602.6	-3.90676	-4.27306
70.8	11636.9	11685.2	11603.9	-4.12146	-4.48776
71.1	11638.7	11685.9	11605.9	-4.08146	-4.44776
71.4	11640.9	11685.9	11608.5	-4.04058	-4.40688
71.7	11643.5	11685.9	11611.6	-4.02535	-4.39165
72	11646.2	11685.9	11614.9	-4.05106	-4.41736
72.3	11649.1	11685.9	11617.9	-3.81811	-4.18441
72.6	11652.1	11685.9	11619.2	-3.82953	-4.19583
72.9	11655	11685.9	11620.1	-3.91249	-4.27879
73.2	11657.8	11686	11620.5	-3.99448	-4.36078
73.5	11660.4	11686.7	11620.5	-4.34133	-4.70763
73.8	11662.9	11687.9	11620.5	-4.18036	-4.54666
74.1	11665.4	11689.5	11620.5	-3.99733	-4.36363
74.4	11668	11692.7	11620.5	-3.99339	-4.35969
74.7	11670.5	11696.6	11620.5	-4.08983	-4.45613
75	11673.2	11700.4	11620.5	-3.9317	-4.298
75.3	11676	11703.9	11620.5	-4.41244	-4.77874
75.6	11679	11707.3	11621	-3.91924	-4.28554
75.9	11682	11710.5	11621.7	-3.97633	-4.34263
76.2	11685.2	11713.7	11622.8	-3.77135	-4.13765
76.5	11688.4	11716.9	11625.1	-3.93124	-4.29754
76.8	11691.6	11720.2	11628.4	-4.2027	-4.569
77.1	11694.8	11723.7	11632.3	-4.18909	-4.55539
77.4	11698	11727.4	11636.7	-4.33281	-4.69911
77.7	11701.1	11731.4	11641.4	-4.46252	-4.84172
78	11704.3	11735.5	11646.3	-4.48146	-4.86066
78.3	11707.5	11739.9	11651.4	-4.66398	-5.04318
78.6	11710.7	11744.6	11656.4	-4.91336	-5.29256
78.9	11713.9	11749.4	11661.4	-4.86423	-5.24343
79.2	11717.2	11754.5	11666.2	-5.00175	-5.38095
79.5	11720.4	11759.7	11670.7	-5.14324	-5.52244
79.8	11723.8	11765	11675.1	-5.14391	-5.52311
80.1	11727.1	11770.1	11679.3	-5.32402	-5.70322
80.4	11730.4	11775.1	11683.4	-5.41528	-5.79448
80.7	11733.7	11779.8	11687.4	-5.2699	-5.6491
81	11737.1	11784	11691.4	-5.17739	-5.55659
81.3	11740.4	11787.8	11695.3	-5.10418	-5.48338
81.6	11743.7	11791.1	11699.2	-5.25133	-5.63053
81.9	11747	11794.1	11703.1	-5.22031	-5.59951
82.2	11750.3	11796.9	11706.9	-5.32563	-5.70483
82.5	11753.6	11799.6	11710.5	-5.3559	-5.7351
82.8	11756.9	11802.2	11714.1	-5.3504	-5.7296
83.1	11760.2	11804.9	11717.4	-5.43811	-5.81731
83.4	11763.5	11807.8	11720.7	-5.5384	-5.9176
83.7	11766.9	11810.8	11723.7	-5.51328	-5.89248
84	11770.2	11813.9	11726.7	-5.49425	-5.87345
84.3	11773.6	11817.1	11729.6	-5.52466	-5.90386
84.6	11776.9	11820.3	11732.5	-5.4657	-5.8449
84.9	11780.2	11823.7	11735.3	-5.58397	-5.96317
85.2	11783.6	11827.1	11738.1	-5.51509	-5.89429
85.5	11786.9	11830.5	11741	-5.46085	-5.84005
85.8	11790.3	11833.9	11744	-5.41663	-5.79583
86.1	11793.6	11837.4	11747.2	-5.39053	-5.76973
86.4	11796.9	11840.9	11750.5	-5.37678	-5.75598
86.7	11800.3	11844.4	11754.2	-5.47693	-5.86963
87	11803.6	11848	11758.1	-5.41444	-5.80714
87.3	11807	11851.6	11762.4	-5.42593	-5.81863
87.6	11810.4	11855.2	11767.1	-5.52289	-5.91559
87.9	11813.7	11859	11772.1	-5.42732	-5.82002
88.2	11817.1	11863	11777.4	-5.45364	-5.84634
88.5	11820.4	11867.2	11780.8	-5.40311	-5.79581
88.8	11823.7	11871.8	11783.7	-5.26454	-5.65724
89.1	11827	11876.7	11786.7	-5.34736	-5.74006
89.4	11830.3	11881.9	11789.8	-5.36064	-5.75334
89.7	11833.5	11887	11792.6	-5.37782	-5.77052
90	11836.6	11890.6	11795	-5.41662	-5.80932
90.3	11839.6	11892.7	11796.8	-5.41781	-5.81051
90.6	11842.5	11894.2	11797.6	-5.36041	-5.75311
90.9	11845.2	11895.1	11797.6	-5.32825	-5.72095
91.2	11847.8	11895.2	11797.6	-5.2254	-5.6181
91.8	11852.3	11895.2	11797.6	-5.16448	-5.55718
92.1	11854.3	11895.2	11797.6	-5.24578	-5.63848
92.4	11856	11895.2	11797.6	-5.32842	-5.72112
92.7	11857.5	11895.2	11797.6	-5.55501	-5.94771
93	11858.8	11895.2	11797.6	-5.62552	-6.01822
93.3	11859.8	11895.4	11797.9	-5.65189	-6.04459
93.6	11860.7	11896.3	11799.7	-5.39445	-5.78715
93.9	11861.8	11897.7	11802.6	-5.45693	-5.84963
94.2	11863.2	11899.5	11806.3	-5.44738	-5.84008
94.5	11865.2	11902.3	11810.6	-5.40018	-5.79288
94.8	11867.9	11907.1	11815.1	-5.30427	-5.69697
95.1	11871.5	11911.9	11822.6	-5.49539	-5.88809
95.4	11876.2	11917.1	11831.1	-5.58075	-5.97345
95.7	11882	11923.2	11839	-5.47445	-5.86715
96	11889	11930.9	11846.3	-5.413	-5.8057
96.3	11897.2	11940.8	11853.1	-5.49621	-5.88891
96.6	11906.7	11953.6	11859.4	-5.58026	-5.98616
96.9	11917.5	11970	11865.1	-5.54892	-5.95482
97.2	11929.6	11990.6	11870.2	-5.57678	-5.98268
97.5	11943.1	12014.8	11874.7	-5.63721	-6.04311
97.8	11957.9	12041.3	11878.5	-5.5846	-5.9905
98.1	11974.2	12068.7	11881.7	-5.72545	-6.13135
98.4	11991.8	12095.9	11884.2	-5.6035	-6.0094
98.7	12010.9	12121.5	11885.9	-5.10624	-5.52524
99	12031.3	12144.1	11886.8	-5.33409	-5.75309
99.3	12053.1	12163	11887.1	-5.42006	-5.83906
99.6	12075.8	12178.3	11888.1	-5.849	-6.268
99.9	12098.7	12191	11891.3	-5.6188	-6.0378
100.2	12121.4	12201.8	11898.2	-5.69497	-6.12707
100.5	12143.3	12211.5	11910.2	-5.62061	-6.05271
100.8	12163.7	12220.8	11928.8	-5.78801	-6.22011
101.1	12182.3	12230.5	11955.6	-5.58671	-6.01881
101.4	12198.7	12241	11990.4	-5.52618	-5.95828
101.7	12213.3	12252.2	12030.8	-5.58303	-6.01513
102.3	12238.7	12275.8	12117.9	-5.53228	-5.97738
102.6	12250.2	12287.9	12159.3	-5.58913	-6.03423
102.9	12261.6	12300	12195.8	-5.67479	-6.11989
103.2	12273.1	12311.8	12224.8	-5.58693	-6.03203
103.5	12285	12323.3	12246.4	-5.46344	-5.90854
103.8	12297	12334.7	12262.3	-5.31313	-5.75823
104.1	12309.2	12346	12273.9	-5.35335	-5.81155
104.4	12321.6	12357.3	12282.9	-5.41171	-5.86991
104.7	12334	12368.6	12291	-5.54263	-6.00083
105	12346.5	12380.2	12299.6	-5.53123	-5.98943
105.3	12359	12391.9	12310.2	-5.66019	-6.11839
105.6	12371.5	12404	12322.5	-5.43519	-5.89339
105.9	12384	12416.4	12336.3	-5.44011	-5.89831
106.2	12396.5	12429.1	12350.9	-5.48881	-5.94701
106.5	12409.1	12442.1	12366.1	-5.65	-6.1213
106.8	12421.7	12455.6	12381.3	-5.66024	-6.13154
107.1	12434.3	12469.5	12396.1	-5.6315	-6.1028
107.4	12447	12483.7	12410.4	-5.52706	-5.99836
107.7	12459.7	12498.2	12424.2	-5.54185	-6.01315
108	12472.4	12512.8	12437.6	-5.61484	-6.08614
108.3	12485.1	12527.4	12450.7	-5.6468	-6.1181
108.6	12497.8	12541.8	12463.7	-5.60061	-6.07191
108.9	12510.4	12555.8	12476.7	-5.53292	-6.01762
109.2	12523	12569.4	12489.8	-5.65617	-6.14087
109.5	12535.4	12582.5	12503	-5.62214	-6.10684
109.8	12547.8	12595.3	12516.2	-5.35749	-5.84219
110.1	12560.1	12607.8	12529.4	-5.40956	-5.89426
110.4	12572.4	12620.2	12542.6	-5.44456	-5.92926
110.7	12584.6	12632.6	12555.7	-5.45121	-5.93591
111	12596.8	12645	12568.7	-5.30554	-5.79024
111.3	12609	12657.7	12581.6	-5.07801	-5.57661
111.6	12621.2	12670.4	12594.2	-4.84642	-5.34502
111.9	12633.3	12683.1	12606.8	-5.0023	-5.5009
112.2	12645.5	12695.6	12619.3	-5.23635	-5.73495
112.5	12657.6	12707.8	12631.7	-5.21556	-5.71416
112.8	12669.8	12719.6	12644.1	-5.27988	-5.77848
113.1	12681.9	12730.9	12656.6	-5.24878	-5.74738
113.4	12694.1	12741.6	12669	-5.26611	-5.76471
113.7	12706.3	12751.9	12681.4	-5.33467	-5.84787
114	12718.5	12762	12693.6	-5.41858	-5.93178
114.3	12730.5	12772	12705.8	-5.48797	-6.00117
114.6	12742.5	12782.1	12717.7	-5.35664	-5.86984
114.9	12754.4	12792.5	12729.3	-5.31013	-5.82333
115.2	12766.1	12803.2	12740.7	-5.2049	-5.7181
115.5	12777.7	12814.3	12751.7	-5.05209	-5.56529
115.8	12789.2	12825.6	12762.6	-5.15506	-5.66826
116.1	12800.6	12837	12773.4	-5.11501	-5.64351
116.4	12811.9	12848.4	12784.2	-5.17887	-5.70737
116.7	12823.1	12859.6	12795	-4.97731	-5.50581
117	12834.3	12870.6	12806	-5.02215	-5.55065
117.3	12845.5	12881.2	12817.3	-5.0956	-5.6241
117.6	12856.7	12891.5	12828.7	-5.09265	-5.62115
117.9	12867.9	12901.6	12840.3	-4.87738	-5.40588
118.2	12879.1	12911.6	12852.1	-4.48465	-5.01315
118.5	12890.4	12921.7	12863.8	-4.45613	-4.98463
118.8	12901.7	12932	12875.6	-4.3576	-4.9005
119.1	12913.1	12942.5	12887.4	-4.46992	-5.01282
119.4	12924.5	12953.4	12899.1	-4.37794	-4.92084
119.7	12935.9	12964.5	12910.8	-4.17614	-4.71904
120	12947.4	12975.9	12922.4	-4.11221	-4.65511
120.3	12959	12987.4	12934	-4.12846	-4.67136
120.6	12970.5	12999	12945.6	-4.05748	-4.60038
120.9	12982.1	13010.5	12957.1	-4.04677	-4.58967
121.2	12993.7	13022.1	12968.7	-4.01278	-4.55568
121.5	13005.2	13033.6	12980.2	-4.06476	-4.62196
121.8	13016.8	13045.1	12991.7	-4.1016	-4.6588
122.1	13028.3	13056.5	13003.1	-4.07809	-4.63529
122.4	13039.8	13067.9	13014.5	-4.14554	-4.70274
122.7	13051.4	13079.3	13025.8	-3.92627	-4.48347
123	13062.9	13090.7	13037	-4.05667	-4.61387
123.3	13074.4	13102.1	13048.2	-4.03705	-4.59425
123.6	13085.9	13113.5	13059.3	-4.03511	-4.59231
123.9	13097.4	13124.9	13070.4	-4.10835	-4.67905
124.2	13108.9	13136.3	13081.4	-4.03458	-4.60528
124.5	13120.4	13147.7	13092.5	-3.85124	-4.42194
124.8	13132	13159	13103.6	-3.93769	-4.50839
125.1	13143.5	13170.4	13114.8	-4.06702	-4.63772
125.4	13155	13181.7	13126	-3.98516	-4.55586
125.7	13166.5	13193	13137.3	-3.79712	-4.36782
126	13178	13204.3	13148.6	-3.72195	-4.29265
126.3	13189.5	13215.7	13159.9	-3.65873	-4.22943
126.6	13201.1	13227	13171.2	-3.60851	-4.19251
126.9	13212.6	13238.4	13182.4	-3.48254	-4.06654
127.2	13224.1	13249.8	13193.5	-3.67998	-4.26398
127.5	13235.7	13261.3	13204.6	-3.82365	-4.40765
127.8	13247.2	13272.9	13215.6	-3.90367	-4.48767
128.1	13258.8	13284.4	13226.7	-3.74179	-4.32579
128.4	13270.3	13295.9	13237.8	-3.84817	-4.43217
128.7	13281.9	13307.5	13248.9	-3.72021	-4.30421
129	13293.4	13319	13260.2	-3.71691	-4.30091
129.3	13304.9	13330.5	13271.5	-3.66038	-4.25748
129.6	13316.5	13342	13283	-3.81888	-4.41598
129.9	13328	13353.5	13294.6	-3.85835	-4.45545
130.2	13339.6	13365	13306.2	-4.19751	-4.79461
130.5	13351.1	13376.4	13317.8	-4.18972	-4.78682
130.8	13362.6	13387.9	13329.3	-4.18163	-4.77873
131.1	13374.2	13399.3	13340.8	-4.31006	-4.90716
131.4	13385.8	13410.7	13352.2	-4.25632	-4.85342
131.7	13397.3	13422.1	13363.5	-4.22099	-4.83149
132	13408.9	13433.6	13374.8	-4.11122	-4.72172
132.3	13420.4	13445	13386	-4.09497	-4.70547
132.6	13432	13456.4	13397.2	-4.04157	-4.65207
132.9	13443.6	13467.9	13408.5	-3.98901	-4.59951
133.2	13455.1	13479.4	13419.7	-3.91409	-4.52459
133.5	13466.7	13491	13431	-3.73416	-4.34466
133.8	13478.2	13502.5	13442.3	-3.89924	-4.50974
134.1	13489.7	13514.1	13453.6	-3.75265	-4.36315
134.4	13501.3	13525.7	13464.9	-3.77622	-4.39952
134.7	13512.8	13537.3	13476.2	-3.74731	-4.37061
135	13524.3	13548.9	13487.4	-3.48651	-4.10981
135.3	13535.8	13560.5	13498.7	-3.07688	-3.70018
135.6	13547.4	13572.1	13510	-3.05854	-3.68184
135.9	13558.9	13583.8	13521.3	-3.31204	-3.93534
136.2	13570.4	13595.4	13532.5	-3.36741	-3.99071
136.5	13582	13607	13543.8	-3.43452	-4.05782
136.8	13593.5	13618.7	13555.2	-3.47584	-4.11214
137.1	13605	13630.4	13566.5	-3.43903	-4.07533
137.4	13616.6	13642.1	13577.9	-3.51022	-4.14652
137.7	13628.1	13653.8	13589.4	-3.60262	-4.23892
138	13639.7	13665.6	13600.8	-3.72079	-4.35709
138.3	13651.2	13677.4	13612.3	-3.50069	-4.13699
138.6	13662.8	13689.4	13623.7	-3.35271	-3.98901
138.9	13674.3	13701.4	13635.1	-3.12319	-3.75949
139.2	13685.8	13713.6	13646.5	-3.04101	-3.67731
139.5	13697.4	13725.9	13657.9	-3.21156	-3.86066
139.8	13709	13738.3	13669.3	-3.35581	-4.00491
140.1	13720.5	13750.9	13680.7	-3.32468	-3.97378
140.4	13732.1	13763.6	13692.1	-3.41662	-4.06572
140.7	13743.7	13776.4	13703.5	-3.28607	-3.93517
141	13755.3	13789.5	13715	-3.3917	-4.0408
141.3	13766.9	13802.6	13726.6	-3.16902	-3.81812
141.6	13778.5	13815.9	13738.3	-3.17274	-3.82184
141.9	13790.1	13829.2	13750	-3.04842	-3.71082
142.2	13801.8	13842.4	13762	-3.21873	-3.88113
142.5	13813.4	13855.4	13774.1	-3.5718	-4.2342
142.8	13825	13868.2	13786.4	-3.51011	-4.17251
143.1	13836.6	13880.7	13799	-3.49208	-4.15448
143.4	13848.2	13892.8	13811.9	-3.37797	-4.04037
143.7	13859.8	13904.7	13824.9	-3.3866	-4.049
144	13871.4	13916.3	13838	-3.27885	-3.94125
144.3	13883	13927.6	13851.1	-3.047	-3.7225
144.6	13894.6	13938.9	13864.2	-3.00675	-3.68225
144.9	13906.2	13950	13877.2	-3.0075	-3.683
145.2	13917.8	13961.1	13890	-3.12152	-3.79702
145.5	13929.4	13972.1	13902.6	-3.22284	-3.89834
145.8	13941	13983.1	13915	-3.45817	-4.13367
146.1	13952.6	13994.2	13927.3	-3.50302	-4.17852
146.4	13964.2	14005.2	13939.4	-3.51015	-4.18565
146.7	13975.8	14016.1	13951.4	-3.36615	-4.04165
147	13987.4	14027.2	13963.3	-3.38977	-4.07777
147.3	13998.9	14038.2	13975.2	-3.5248	-4.2128
147.6	14010.5	14049.2	13986.9	-3.56794	-4.25594
147.9	14022.1	14060.2	13998.6	-3.32491	-4.01291
148.2	14033.6	14071.3	14010.3	-3.06917	-3.75717
148.5	14045.2	14082.4	14021.9	-2.89343	-3.58143
148.8	14056.7	14093.5	14033.5	-2.91017	-3.59817
149.1	14068.2	14104.6	14045	-3.24553	-3.93353
149.4	14079.7	14115.8	14056.5	-3.59361	-4.29391
149.7	14091.2	14127	14068	-3.78702	-4.48732
150	14102.7	14138.3	14079.5	-3.96078	-4.66108
150.3	14114.2	14149.6	14091	-3.89015	-4.59045
150.6	14125.7	14160.9	14102.4	-3.69734	-4.39764
150.9	14137.2	14172.3	14113.9	-3.49568	-4.19598
151.2	14148.7	14183.8	14125.3	-3.45369	-4.15399
151.5	14160.2	14195.3	14136.8	-3.49492	-4.19522
151.8	14171.7	14206.9	14148.2	-3.45272	-4.16522
152.1	14183.2	14218.6	14159.6	-3.33376	-4.04626
152.4	14194.7	14230.3	14171	-3.33582	-4.04832
152.7	14206.1	14242	14182.3	-3.27112	-3.98362
153	14217.6	14253.8	14193.7	-3.24932	-3.96182
153.3	14229	14265.6	14204.9	-3.26352	-3.97602
153.6	14240.5	14277.4	14216.2	-3.09972	-3.81222
153.9	14251.9	14289.2	14227.4	-3.20114	-3.91364
154.2	14263.3	14301	14238.6	-3.16111	-3.87361
154.5	14274.8	14312.7	14249.8	-3.29139	-4.01599
154.8	14286.2	14324.3	14261	-3.38571	-4.11031
155.1	14297.6	14335.9	14272.2	-3.48165	-4.20625
155.4	14308.9	14347.4	14283.4	-3.59383	-4.31843
155.7	14320.3	14358.7	14294.6	-3.48929	-4.21389
156	14331.6	14370	14305.8	-3.51076	-4.23536
156.3	14342.9	14381.1	14316.9	-3.28253	-4.00713
156.6	14354.2	14392.1	14328.1	-3.14528	-3.86988
156.9	14365.4	14403	14339.1	-3.16842	-3.90532
157.2	14376.5	14413.7	14350.1	-3.14696	-3.88386
157.5	14387.6	14424.4	14361.1	-3.33075	-4.06765
157.8	14398.7	14435	14372.1	-3.28628	-4.02318
158.1	14409.9	14445.8	14383.2	-3.32777	-4.06467
158.4	14421.3	14456.7	14394.4	-3.43222	-4.16912
158.7	14432.8	14467.8	14405.8	-3.4478	-4.1847
159	14444.5	14479.3	14417.4	-3.45386	-4.19076
159.3	14456.4	14491	14429.3	-3.43949	-4.18839
159.6	14468.4	14503	14441.2	-3.29993	-4.04883
159.9	14480.3	14514.8	14453	-3.14925	-3.89815
160.2	14491.9	14526.4	14464.3	-3.12654	-3.87544
160.5	14503	14537.4	14475.1	-2.97389	-3.72279
160.8	14513.4	14547.6	14485.1	-3.04887	-3.79777
161.1	14523	14556.9	14494	-3.03171	-3.78061
161.4	14531.8	14565.3	14502	-2.98016	-3.72906
161.7	14540.5	14573.7	14509.9	-2.69186	-3.45236
162	14550	14582.9	14518.6	-2.71996	-3.48046
162.3	14560.8	14593.6	14528.7	-3.11301	-3.87351
162.6	14573.9	14606.9	14541.3	-3.28129	-4.04179
162.9	14589.7	14623.4	14556.9	-3.42414	-4.18464
163.2	14609.1	14644	14576.5	-2.99131	-3.75181
163.5	14631.8	14668.2	14599.6	-3.00096	-3.76146
163.8	14657	14695.1	14625.4	-3.14456	-3.91736
164.1	14683.7	14723.4	14652.7	-3.69237	-4.46517
164.4	14711.3	14752.2	14680.6	-3.73516	-4.50796
164.7	14738.9	14780.3	14708.2	-3.6903	-4.4631
165	14765.6	14806.6	14734.3	-3.93843	-4.71123
165.3	14790.9	14830.5	14758.4	-3.88341	-4.65621
165.6	14814.8	14852.4	14780.7	-3.87704	-4.64984
165.9	14837.7	14873.1	14801.7	-3.81547	-4.58827
166.2	14860	14893.6	14822.1	-3.66395	-4.43675
166.5	14881.9	14914.5	14842.5	-3.65418	-4.42698
166.8	14903.8	14936.9	14863.5	-3.97531	-4.76001
167.1	14926.1	14961.4	14885.5	-4.54405	-5.32875
167.4	14948.8	14988.3	14908.9	-4.81869	-5.60339
167.7	14971.9	15016.8	14933.3	-5.4744	-6.2591
168	14995.3	15046.3	14958.3	-5.59229	-6.37699
168.3	15018.9	15075.7	14983.6	-5.67342	-6.45812
168.6	15042.5	15104.4	15008.7	-5.64195	-6.42665
168.9	15066	15131.4	15033.2	-5.70924	-6.49394
169.2	15089.3	15156.1	15056.8	-5.71698	-6.51378
169.5	15112.3	15178.4	15079.4	-5.79182	-6.58862
169.8	15134.8	15198.7	15101	-5.93669	-6.73349
170.1	15156.7	15217.4	15121.8	-5.94536	-6.74216
170.4	15177.8	15234.9	15141.7	-5.94002	-6.73682
170.7	15198.1	15251.7	15160.9	-6.01243	-6.80923
171	15217.3	15268.2	15179.4	-6.0601	-6.8569
171.3	15235.4	15284.7	15197.2	-6.09638	-6.89318
171.6	15252.3	15301	15214.4	-5.99689	-6.79369
171.9	15268.2	15317	15230.8	-5.9852	-6.782
172.2	15282.9	15332.4	15246.4	-5.97725	-6.78505
172.5	15296.7	15347.1	15261.1	-5.79844	-6.60624
172.8	15309.4	15360.7	15274.9	-5.78333	-6.59113
173.1	15321.2	15373	15287.7	-5.73662	-6.54442
173.4	15332.1	15384.1	15299.6	-5.78483	-6.60353
173.7	15342.3	15394.2	15310.6	-5.81411	-6.63281
174	15352	15403.7	15320.9	-5.90964	-6.73934
174.3	15361.3	15412.9	15330.8	-5.89253	-6.73283
174.6	15370.4	15422	15340.4	-5.84744	-6.68774
174.9	15379.6	15431.5	15349.8	-5.82344	-6.67384
175.2	15388.8	15441.5	15359.2	-5.8474	-6.6978
175.5	15398.3	15452.3	15368.7	-5.85696	-6.70736
175.8	15407.9	15463.6	15378.2	-5.91901	-6.77981
176.1	15417.6	15475.4	15387.7	-5.89331	-6.75411
176.4	15427.4	15487.6	15397.2	-5.89857	-6.75937
176.7	15437.2	15500.2	15406.6	-5.81625	-6.67705
177	15447.1	15512.9	15415.9	-5.68292	-6.54372
177.3	15456.9	15525.8	15425.2	-5.66409	-6.52489
177.6	15466.7	15538.7	15434.4	-5.69863	-6.55943
177.9	15476.5	15551.4	15443.4	-5.72527	-6.58607
178.2	15486.1	15563.8	15452.5	-5.73197	-6.59277
178.5	15495.7	15575.8	15461.5	-5.9102	-6.771
178.8	15505.2	15587.1	15470.5	-5.8317	-6.6925
179.1	15514.5	15597.6	15479.6	-5.72078	-6.58158
179.4	15523.8	15607.4	15488.7	-5.69454	-6.55534
179.7	15532.9	15616.6	15497.8	-5.75139	-6.61219
180	15541.9	15625.5	15506.9	-5.82151	-6.68231
180.3	15550.9	15634.3	15516	-5.90101	-6.76181
180.6	15559.8	15643.2	15525.1	-5.91313	-6.78433
180.9	15568.7	15652.5	15534.1	-5.78366	-6.65486
181.2	15577.6	15662.4	15543.1	-5.60573	-6.47693
181.5	15586.5	15672.8	15552.1	-5.7019	-6.5731
181.8	15595.4	15683.7	15561	-5.71423	-6.58543
182.1	15604.2	15694.9	15569.9	-5.72282	-6.59402
182.4	15613	15706.2	15578.8	-5.87691	-6.74811
182.7	15621.7	15717.6	15587.7	-5.90243	-6.77363
183	15630.3	15728.8	15596.7	-6.00309	-6.87429
183.3	15638.8	15739.7	15605.6	-5.94534	-6.81654
183.6	15647.2	15750.1	15614.6	-6.11517	-6.98637
183.9	15655.6	15759.9	15623.6	-6.1805	-7.0517
184.2	15663.9	15768.7	15632.6	-6.21561	-7.08681
184.5	15672.3	15776.4	15641.6	-6.29132	-7.17262
184.8	15680.7	15782.7	15650.6	-6.30754	-7.18884
185.1	15689.1	15787.5	15659.6	-6.30214	-7.18344
185.4	15697.6	15790.9	15668.5	-6.15898	-7.04028
185.7	15706.2	15793.4	15677.5	-6.12723	-7.00853
186	15714.8	15795.5	15686.4	-6.11489	-6.99619
186.3	15723.5	15798	15695.3	-6.22313	-7.10443
186.6	15732.3	15801.4	15704.2	-6.20669	-7.08799
186.9	15741.1	15806.3	15713	-6.1247	-7.006
187.2	15749.9	15813.3	15721.9	-6.28552	-7.16682
187.5	15758.8	15822.2	15730.7	-6.48281	-7.36411
187.8	15767.7	15832.5	15739.5	-6.45319	-7.33449
188.1	15776.6	15843.7	15748.3	-6.42176	-7.30306
188.4	15785.5	15855.3	15757.1	-6.49129	-7.37259
188.7	15794.4	15866.6	15765.9	-6.36024	-7.25124
189	15803.2	15877.2	15774.7	-6.177	-7.068
189.3	15812	15886.7	15783.4	-6.36617	-7.25717
189.6	15820.8	15895.1	15792.2	-6.74297	-7.63397
189.9	15829.5	15902.6	15801	-6.64663	-7.53763
190.2	15838.3	15909.5	15809.7	-6.5949	-7.4859
190.5	15847	15916	15818.5	-6.55956	-7.45056
190.8	15855.7	15922.3	15827.2	-6.58129	-7.47229
191.1	15864.3	15928.6	15835.9	-6.69638	-7.58738
191.4	15873	15935	15844.7	-6.70994	-7.60094
191.7	15881.7	15941.5	15853.4	-6.60653	-7.49753
192	15890.4	15948.1	15862.2	-6.60604	-7.49704
192.3	15899	15954.8	15870.9	-6.56929	-7.46029
192.6	15907.7	15961.7	15879.6	-6.39254	-7.29354
192.9	15916.3	15968.6	15888.4	-6.45442	-7.35542
193.2	15924.9	15975.6	15897.1	-6.34155	-7.24255
193.5	15933.5	15982.6	15905.8	-6.42799	-7.32899
193.8	15942	15989.8	15914.5	-6.5447	-7.4457
194.1	15950.5	15997	15923.1	-6.61675	-7.51775
194.4	15959.1	16004.2	15931.8	-6.58751	-7.48851
194.7	15967.6	16011.6	15940.4	-6.76273	-7.66373
195	15976	16019	15948.9	-6.68045	-7.58145
195.3	15984.5	16026.4	15957.4	-6.71429	-7.61529
195.6	15993	16034.1	15965.9	-6.75991	-7.66091
195.9	16001.5	16041.9	15974.3	-6.66639	-7.56739
196.2	16009.9	16049.9	15982.7	-6.69306	-7.59406
196.5	16018.4	16058.3	15991.1	-6.75704	-7.65804
196.8	16026.9	16067.2	15999.5	-6.93887	-7.84867
197.1	16035.4	16076.4	16007.9	-6.8813	-7.7911
197.4	16043.9	16086.1	16016.3	-6.83563	-7.74543
197.7	16052.4	16096	16024.7	-7.03631	-7.94611
198	16060.8	16105.8	16033	-7.31872	-8.22852
198.3	16069.2	16115.3	16041.2	-7.44335	-8.35315
198.6	16077.5	16124.1	16049.3	-7.66246	-8.57226
198.9	16085.7	16132.1	16057.3	-7.63842	-8.54822
199.2	16093.8	16139.1	16065.1	-7.74184	-8.65164
199.5	16101.7	16145	16072.7	-7.80306	-8.71286
199.8	16109.5	16150.4	16080.1	-7.92158	-8.83138
200.1	16117.2	16155.4	16087.4	-7.95984	-8.86964
200.4	16124.8	16160.4	16094.7	-7.94279	-8.85259
200.7	16132.3	16165.8	16101.9	-7.72599	-8.63579
201	16139.7	16171.8	16109	-7.69056	-8.60856
201.3	16147	16178.8	16116.1	-8.00431	-8.92231
201.6	16154.3	16186.6	16123.2	-8.05009	-8.96809
201.9	16161.6	16195	16130.3	-7.89339	-8.81139
202.2	16169	16203.8	16137.3	-7.81787	-8.73587
202.5	16176.5	16212.9	16144.3	-7.66929	-8.58729
202.8	16184.3	16222.1	16151.2	-7.43027	-8.34827
203.1	16192.3	16231.1	16158.1	-7.1201	-8.0381
203.4	16200.6	16239.8	16164.8	-6.97439	-7.89239
203.7	16208.9	16248.3	16171.6	-6.78926	-7.70726
204	16217.1	16256.5	16178.2	-6.46706	-7.38506
204.3	16224.9	16264.5	16184.8	-6.44797	-7.36597
204.6	16232.1	16272.2	16191.2	-6.40188	-7.31988
204.9	16238.7	16279.8	16197.6	-6.40226	-7.32836
205.2	16244.2	16287.1	16203.9	-6.4046	-7.3307
205.5	16249	16294.1	16210.2	-6.3461	-7.2722
205.8	16253.1	16300.8	16216.3	-6.36895	-7.29505
206.1	16256.9	16306.9	16222.4	-6.32348	-7.24958
206.4	16260.7	16312.5	16228.5	-6.28301	-7.20911
206.7	16264.6	16317.3	16234.5	-6.34802	-7.27412
207	16269	16321.4	16240.5	-6.44895	-7.37505
207.3	16274.1	16324.6	16246.5	-6.33267	-7.25877
207.6	16279.7	16327.2	16252.5	-6.26137	-7.18747
207.9	16285.9	16329.6	16258.4	-6.16334	-7.08944
208.2	16292.3	16332	16264.3	-6.23555	-7.16165
212.2	16380.5	16421.3	16333.9	-6.52548	-7.45918
212.5	16387.3	16429	16338.4	-6.2057	-7.1394
212.8	16394	16436.6	16342.8	-6.41099	-7.35199
213.1	16400.8	16444.2	16347.2	-6.35877	-7.29977
213.4	16407.5	16451.9	16351.6	-6.40598	-7.34698
213.7	16414.2	16459.6	16356	-6.311	-7.252
214	16420.9	16467.4	16360.3	-6.28518	-7.22618
214.3	16427.6	16475.1	16364.6	-6.23924	-7.18024
214.6	16434.3	16482.9	16368.9	-6.22002	-7.16102
214.9	16441	16490.6	16372.9	-6.03149	-6.97249
215.2	16447.8	16498.4	16374.9	-5.89426	-6.83526
215.5	16454.6	16506.1	16376.9	-6.46206	-7.40306
215.8	16461.3	16513.8	16378.9	-6.19853	-7.13953
216.1	16464.6	16521.5	16380.8	-6.27714	-7.21814
216.4	16468	16529.3	16382.8	-6.25745	-7.19845
216.7	16471.3	16537	16384.7	-6.12842	-7.06942
217	16474.6	16544.7	16386.7	-6.13517	-7.07617
217.3	16477.8	16552.4	16388.6	-6.1021	-7.0431
217.6	16481	16560.1	16390.6	-6.32766	-7.26866
217.9	16484.2	16567.9	16392.5	-6.15843	-7.09943
218.2	16487.4	16575.7	16394.4	-6.05584	-6.99684
218.5	16490.8	16583.6	16396.1	-6.03963	-6.98063
218.8	16494.3	16590.7	16397.7	-6.01849	-6.95949
219.1	16498	16594.8	16399.2	-5.98614	-6.92714
219.4	16501.8	16598.9	16400.4	-6.04201	-6.98301
219.7	16505.5	16603	16401.3	-6.19977	-7.14797
220	16509	16607.1	16401.7	-6.05828	-7.00648
220.3	16512	16611.2	16401.7	-5.97343	-6.92163
220.6	16514.4	16615.1	16401.7	-6.02586	-6.97406
220.9	16515.8	16618.8	16401.7	-5.99865	-6.94685
221.2	16516.2	16622.3	16401.7	-5.96553	-6.91373
221.5	16516.2	16625.6	16401.7	-5.94634	-6.89454
221.8	16516.3	16628.6	16401.7	-6.00686	-6.95506
222.1	16516.4	16631.3	16401.7	-5.95215	-6.90035
222.4	16516.5	16633.8	16401.7	-5.88748	-6.83568
222.7	16516.5	16635.9	16401.7	-5.95364	-6.90184
223	16516.6	16637.7	16401.7	-5.89581	-6.84401
223.3	16516.7	16639.1	16401.7	-5.83324	-6.78144
223.6	16516.8	16640	16401.7	-5.84126	-6.78946
223.9	16516.8	16640.1	16401.7	-5.95659	-6.90479
224.2	16516.9	16640.1	16401.7	-5.94885	-6.89705
224.5	16517	16640.1	16402.2	-5.78061	-6.72881
224.8	16517.1	16640.1	16403	-5.7105	-6.6587
225.1	16517.2	16640.1	16404	-5.71345	-6.66165
225.4	16517.2	16640.1	16405.2	-5.74298	-6.69118
225.7	16517.3	16640.1	16406.6	-5.88675	-6.83495
226	16519.6	16640.1	16408.3	-5.84527	-6.79347
226.3	16522.8	16640.1	16410.3	-5.797	-6.7452
226.6	16526.6	16640.1	16412.7	-5.95505	-6.90325
226.9	16530.6	16640.1	16415.5	-6.06663	-7.01483
227.2	16534.5	16640.1	16418.8	-6.15621	-7.10441
227.5	16538.3	16640.4	16422.5	-6.15282	-7.10102
227.8	16542	16642.3	16426.6	-5.96597	-6.91417
228.1	16545.6	16645.6	16431.3	-5.924	-6.8722
228.4	16549.1	16649.6	16440.3	-5.90073	-6.84893
228.7	16552.6	16654.1	16449.5	-6.00964	-6.95784
229	16556.1	16658.4	16458.8	-5.9869	-6.9351
229.3	16559.6	16662.4	16467.9	-5.78709	-6.73529
229.6	16563.2	16665.8	16476.9	-5.76662	-6.71482
229.9	16566.9	16669	16485.9	-5.75131	-6.69951
230.2	16570.5	16671.9	16494.8	-5.9198	-6.8745
230.5	16577.2	16674.7	16503.7	-5.97701	-6.93171
230.8	16584.5	16677.5	16512.6	-6.29459	-7.24929
231.1	16591.9	16680.3	16521.7	-6.34364	-7.29834
231.4	16599.3	16683.3	16530.8	-6.19295	-7.14765
231.7	16606.7	16686.5	16539.8	-5.90818	-6.86288
232	16614.1	16689.8	16548.8	-5.84116	-6.79586
232.3	16621.5	16696.1	16557.5	-5.85633	-6.81103
232.6	16628.9	16703.3	16565.8	-5.95738	-6.91208
232.9	16636.4	16710.8	16573.7	-5.99052	-6.94522
233.2	16643.9	16718.7	16581	-6.03831	-6.99301
233.5	16651.5	16726.9	16587.8	-5.93653	-6.89123
233.8	16659.2	16735.9	16594.3	-5.91038	-6.86508
234.1	16667	16745.8	16600.4	-5.70955	-6.66425
234.4	16675	16757	16606.5	-5.64427	-6.59897
234.7	16683.2	16769.6	16612.6	-5.58607	-6.54077
235	16691.6	16783.9	16618.8	-5.84471	-6.79941
235.3	16700.3	16800.1	16625.2	-5.76393	-6.72503
235.6	16709.3	16817.5	16631.9	-5.71124	-6.67234
235.9	16718.4	16835.6	16638.7	-5.75311	-6.71421
236.2	16727.6	16853.6	16645.5	-5.82376	-6.78486
236.5	16736.9	16870.9	16652.2	-5.82884	-6.78994
236.8	16746.2	16886.7	16658.8	-5.73186	-6.69296
237.1	16755.4	16900.5	16665.2	-5.75223	-6.71333
237.4	16764.5	16911.9	16671.4	-5.71685	-6.67795
237.7	16773.6	16921.3	16677.8	-5.78218	-6.74328
238	16782.5	16929.2	16684.7	-5.65171	-6.61281
238.3	16791.3	16935.8	16692.4	-5.71913	-6.68023
238.6	16800	16941.8	16701.4	-5.8716	-6.8391
238.9	16808.6	16947.4	16711.8	-5.68303	-6.65053
239.2	16817.1	16953.1	16724.1	-5.60374	-6.57124
239.5	16825.6	16958.9	16737.9	-5.93555	-6.90305
239.8	16833.9	16964.9	16752.8	-6.11703	-7.08453
240.1	16842.1	16971.1	16768	-6.19388	-7.16138
240.4	16850.3	16977.2	16783	-6.14466	-7.11216
240.7	16858.5	16983.4	16797.2	-6.26957	-7.23707
241	16866.6	16989.4	16810	-6.27045	-7.23795
241.3	16874.7	16995.4	16821	-6.26792	-7.23542
241.6	16882.8	17001.4	16830.4	-6.21283	-7.18033
241.9	16890.8	17007.2	16838.6	-6.19789	-7.16539
242.2	16898.9	17013.1	16845.9	-6.17425	-7.14835
242.5	16906.9	17018.9	16852.7	-6.18383	-7.15793
243.1	16922.9	17030.7	16866.3	-6.28992	-7.26402
243.4	16930.8	17036.8	16873.7	-6.30222	-7.27632
243.7	16938.7	17042.9	16881.5	-6.32254	-7.29664
244	16946.7	17049.2	16889.5	-6.24033	-7.21443
244.3	16954.6	17055.6	16897.6	-6.12595	-7.10005
244.6	16962.5	17062.1	16905.8	-6.07317	-7.04727
244.9	16970.5	17068.7	16913.8	-6.06375	-7.03785
245.5	16986.5	17082.5	16929.3	-6.1409	-7.115
245.8	16994.6	17089.5	16936.6	-6.24134	-7.21544
246.1	17002.7	17096.7	16943.9	-6.14009	-7.11989
246.4	17010.9	17104	16951	-6.15329	-7.13309
246.7	17019	17111.3	16958	-6.14015	-7.11995
247	17027.2	17118.6	16965	-6.2666	-7.2464
247.3	17035.5	17126	16971.9	-6.273	-7.2528
247.6	17043.7	17133.5	16978.8	-6.0968	-7.0766
247.9	17052	17141.3	16985.7	-6.28151	-7.26131
248.2	17060.2	17149.4	16992.6	-6.18771	-7.16751
248.5	17068.5	17157.9	16999.6	-6.30681	-7.28661
248.8	17076.7	17167	17006.6	-6.16718	-7.14698
249.1	17085	17176.7	17013.6	-6.27593	-7.25573
249.4	17093.2	17187.1	17020.7	-6.29502	-7.27482
249.7	17101.4	17198	17027.9	-6.31649	-7.30159
250	17109.6	17209.2	17035	-6.30115	-7.28625
250.3	17117.8	17220.6	17042.2	-6.16176	-7.14686
250.6	17125.9	17231.9	17049.5	-6.08226	-7.06736
250.9	17134.1	17243.1	17056.7	-6.42272	-7.40782
251.2	17142.3	17253.8	17064	-6.46193	-7.44703
251.5	17150.4	17264.1	17071.2	-6.22894	-7.21404
251.8	17158.6	17273.9	17078.4	-6.13842	-7.12352
252.4	17174.8	17292.1	17092.8	-6.19471	-7.17981
252.7	17182.9	17300.4	17099.9	-6.13158	-7.11668
253	17190.9	17308.1	17106.9	-6.13901	-7.12411
253.3	17198.9	17315.2	17113.9	-6.09776	-7.08286
253.6	17206.8	17322	17120.9	-6.24626	-7.23676
253.9	17214.7	17328.4	17127.8	-6.23885	-7.22935
254.2	17222.5	17334.8	17134.7	-6.28151	-7.27201
254.5	17230.3	17341.2	17141.5	-6.19448	-7.18498
254.8	17238.1	17347.8	17148.4	-6.02947	-7.01997
255.1	17245.8	17354.7	17155.2	-6.13255	-7.12305
255.4	17253.5	17362	17162	-6.06766	-7.05816
255.7	17261.2	17369.5	17168.9	-6.11578	-7.10628
256	17268.9	17377.2	17175.9	-6.16245	-7.15295
256.3	17276.5	17384.9	17182.9	-6.21942	-7.20992
256.6	17284.1	17392.4	17190.1	-6.11176	-7.10226
256.9	17291.7	17399.7	17197.4	-5.97301	-6.96351
257.2	17299.3	17406.5	17204.9	-5.88545	-6.87595
257.5	17306.9	17412.9	17212.5	-5.9587	-6.9541
257.8	17314.5	17418.9	17220.2	-5.92949	-6.92489
258.1	17322.1	17424.8	17228	-5.89808	-6.89348
258.4	17329.6	17430.5	17235.8	-5.85928	-6.85468
258.67	17336.4	17435.7	17242.7	-5.84536	-6.84076
258.94	17343.3	17440.9	17249.5	-5.80699	-6.80239
259.21	17350.1	17446.2	17256.2	-5.69126	-6.68666
259.48	17356.9	17451.8	17262.8	-5.73195	-6.72735
259.75	17363.7	17457.5	17269.2	-5.58617	-6.58157
260.02	17370.5	17463.4	17275.5	-5.65929	-6.65469
260.29	17377.2	17469.5	17281.8	-5.64262	-6.63802
260.56	17384	17476	17287.9	-5.78371	-6.77911
260.83	17390.7	17482.7	17294	-5.78168	-6.77708
261.1	17397.4	17489.8	17300.1	-5.86121	-6.85661
261.37	17404.1	17497.2	17306.2	-5.90442	-6.90472
261.64	17410.8	17504.8	17312.2	-5.89624	-6.89654
261.91	17417.4	17512.7	17318.1	-5.81219	-6.81249
262.18	17424.1	17520.6	17324	-5.76911	-6.76941
262.45	17430.7	17528.6	17329.9	-5.74343	-6.74373
262.72	17437.4	17536.6	17335.6	-5.79942	-6.79972
262.99	17444.1	17544.5	17341.3	-5.89468	-6.89498
263.26	17450.8	17552.3	17346.8	-5.9773	-6.9776
263.53	17457.5	17559.9	17352.3	-5.94359	-6.94389
263.8	17464.2	17567.5	17357.8	-5.94489	-6.94519
264.07	17471	17575	17363.3	-6.01541	-7.01571
264.34	17477.7	17582.5	17368.7	-5.86109	-6.86139
264.61	17484.5	17590.1	17374.2	-5.81879	-6.81909
264.88	17491.2	17597.7	17379.8	-5.80231	-6.80261
265.15	17497.9	17605.4	17385.5	-5.77987	-6.78017
265.42	17504.6	17613.3	17391.3	-5.9433	-6.9481
265.69	17511.2	17621.2	17397.2	-5.78039	-6.78519
265.96	17517.9	17629.3	17403.2	-5.71319	-6.71799
266.23	17524.5	17637.4	17409.1	-5.90544	-6.91024
266.5	17531.2	17645.5	17415.1	-5.85749	-6.86229
266.77	17537.8	17653.7	17421	-5.872	-6.8768
267.04	17544.5	17661.9	17426.9	-5.79028	-6.79508
267.31	17551.2	17670.1	17432.7	-5.88529	-6.89009
267.58	17557.9	17678.3	17438.4	-5.86758	-6.87238
267.85	17564.6	17686.5	17444.1	-6.01454	-7.01934
268.12	17571.3	17694.8	17449.8	-5.83664	-6.84144
268.39	17578	17703.1	17455.4	-5.71803	-6.72283
268.66	17584.7	17711.4	17461.1	-5.68653	-6.69133
268.93	17591.4	17719.7	17466.8	-5.77266	-6.77746
269.2	17598.2	17728.1	17472.5	-5.96138	-6.96618
269.47	17604.9	17736.5	17478.3	-5.86402	-6.87282
269.74	17611.6	17745	17484.1	-5.85357	-6.86237
270.01	17618.4	17753.5	17489.8	-5.9324	-6.9412
270.28	17625.2	17762.1	17495.6	-5.69511	-6.70391
270.55	17632	17770.7	17501.2	-5.9044	-6.9132
270.82	17638.9	17779.3	17506.8	-5.7294	-6.7382
271.09	17645.9	17788	17512.3	-5.84707	-6.85587
271.36	17652.9	17796.6	17517.7	-5.86199	-6.87079
271.63	17659.9	17805.3	17523	-5.94931	-6.95811
271.9	17667	17814	17528.1	-5.85063	-6.85943
272.17	17674.1	17822.7	17533.1	-5.84698	-6.85578
272.44	17681.3	17831.4	17538	-5.80733	-6.81613
272.71	17688.4	17840	17542.7	-5.77746	-6.78626
272.98	17695.6	17848.6	17547.3	-5.89894	-6.90774
273.25	17702.7	17857.2	17551.8	-5.92103	-6.93393
273.52	17709.8	17865.7	17556.1	-5.995	-7.0079
273.79	17716.8	17874.2	17560.4	-5.9403	-6.9532
274.06	17723.9	17882.7	17564.7	-5.84401	-6.85691
274.33	17730.9	17891.1	17568.9	-5.71189	-6.72479
274.6	17738	17899.6	17573.1	-5.72441	-6.73731
274.87	17745	17908	17577.4	-5.74172	-6.75462
275.14	17751.9	17916.5	17581.8	-5.74948	-6.76238
275.41	17758.9	17925	17586.2	-6.03246	-7.04536
275.68	17765.9	17933.4	17590.8	-5.87064	-6.88354
275.95	17772.8	17941.9	17595.4	-5.8588	-6.8717
276.22	17779.8	17950.4	17600.2	-5.76646	-6.77936
276.49	17786.8	17958.9	17605	-5.87777	-6.89067
276.76	17793.7	17967.3	17610	-5.97242	-6.98532
277.03	17800.8	17975.8	17615	-6.00134	-7.01424
277.3	17807.8	17984.2	17620.2	-6.10794	-7.12444
277.57	17814.9	17992.7	17625.4	-6.13048	-7.14698
277.84	17821.9	18001.1	17630.6	-6.06426	-7.08076
278.11	17828.9	18009.6	17635.8	-6.06787	-7.08437
278.38	17835.8	18018.1	17640.8	-5.91048	-6.92698
278.65	17842.6	18026.5	17645.7	-5.9541	-6.9706
278.92	17849.4	18035.1	17650.4	-6.03547	-7.05197
279.19	17855.9	18043.6	17654.8	-5.97985	-6.99635
279.46	17862.4	18052.2	17658.9	-5.92638	-6.94288
279.73	17868.8	18060.8	17662.9	-5.91599	-6.93249
280	17875.1	18069.5	17666.7	-6.17554	-7.19204
280.27	17881.4	18078.1	17670.4	-6.16444	-7.18094
280.54	17887.6	18086.7	17674.2	-5.93167	-6.94817
280.81	17893.8	18095.3	17678	-5.91945	-6.93595
281.08	17900.1	18103.9	17681.9	-5.94056	-6.96086
281.35	17906.4	18112.4	17686	-6.05605	-7.07635
281.62	17912.6	18120.9	17690.1	-6.01335	-7.03365
281.89	17918.7	18129.3	17694.3	-5.8973	-6.9176
282.16	17924.7	18137.7	17698.4	-5.89334	-6.91364
282.43	17930.5	18145.9	17702.4	-6.02431	-7.04461
282.7	17935.9	18154.1	17706.3	-5.89008	-6.91038
282.97	17941	18162.1	17710	-5.97587	-6.99617
283.24	17945.7	18170.1	17713.4	-6.01588	-7.03618
283.51	17950.1	18177.8	17716.6	-5.99398	-7.01428
283.78	17954.1	18185.4	17719.7	-6.08363	-7.10393
284.05	17958	18192.5	17722.6	-6.24819	-7.26849
284.32	17961.8	18199.3	17725.5	-6.2603	-7.2806
284.59	17965.5	18205.6	17728.3	-6.27024	-7.29054
284.86	17969.3	18211.4	17731.2	-6.277	-7.2973
285.13	17973.3	18216.6	17734.2	-6.12142	-7.14172
285.4	17977.4	18221.2	17737.2	-6.18982	-7.21012
285.7	17982.1	18225.8	17740.7	-6.2564	-7.2767
286	17986.9	18230.2	17744.3	-6.19169	-7.21199
286.3	17991.9	18234.5	17747.8	-6.35481	-7.37511
286.6	17996.8	18239	17751.3	-6.50004	-7.52034
286.9	18001.7	18243.9	17754.7	-6.47908	-7.50198
287.2	18006.5	18249.5	17758	-6.54886	-7.57176
287.5	18011.3	18255.7	17761.2	-6.40572	-7.42862
287.8	18016.2	18262.5	17764.3	-6.36736	-7.39026
288.1	18021	18269.7	17767.6	-6.4582	-7.4811
288.4	18026	18277.3	17770.9	-6.40205	-7.42495
288.7	18031.2	18285.2	17774.5	-6.27136	-7.29426
289	18036.6	18293.4	17778.4	-6.3214	-7.3443
289.3	18042.3	18301.6	17782.6	-6.44016	-7.46306
289.6	18048.2	18309.9	17787.1	-6.58923	-7.61213
289.9	18054.4	18318.3	17791.8	-6.49483	-7.51773
290.2	18060.7	18326.9	17796.6	-6.4802	-7.5031
290.5	18067.2	18335.6	17801.3	-6.56458	-7.58748
290.8	18073.7	18344.4	17806.1	-6.61416	-7.63706
291.1	18080.4	18353.4	17810.6	-6.57033	-7.59323
291.4	18087	18362.5	17815	-6.6009	-7.6238
291.7	18093.7	18371.8	17819.1	-6.6025	-7.6276
292	18100.5	18381.1	17823.2	-6.66069	-7.68579
292.3	18107.2	18390.5	17827.1	-6.61691	-7.64201
292.6	18114	18400	17830.9	-6.58734	-7.61244
292.9	18120.9	18409.5	17834.7	-6.56634	-7.59144
293.2	18127.8	18419.1	17838.5	-6.50887	-7.53397
293.5	18134.7	18428.6	17842.3	-6.4779	-7.503
293.8	18141.7	18438.2	17846.1	-6.41815	-7.44325
294.1	18148.7	18447.7	17849.9	-6.22178	-7.24688
294.4	18155.7	18457.3	17853.7	-6.2623	-7.2874
294.7	18162.8	18466.9	17857.6	-6.20383	-7.22893
295	18170	18476.5	17861.5	-6.25379	-7.27889
295.3	18177.2	18486.1	17865.5	-6.25339	-7.27849
295.6	18184.4	18495.7	17869.5	-6.41508	-7.44018
295.9	18191.7	18505.3	17873.6	-6.15574	-7.18274
296.2	18198.9	18514.9	17877.7	-5.99736	-7.02436
296.5	18206	18524.4	17881.8	-6.03119	-7.05819
296.8	18213.1	18533.8	17886	-5.92798	-6.95498
297.1	18220.2	18543.1	17890.2	-5.962	-6.989
297.4	18227.1	18552.3	17894.4	-6.00365	-7.03065
297.7	18233.9	18561.4	17898.6	-5.99992	-7.02692
298	18240.7	18570.5	17902.7	-5.90553	-6.93253
298.3	18247.5	18579.5	17906.8	-5.99239	-7.01939
298.6	18254.3	18588.5	17910.9	-5.90249	-6.92949
298.9	18261.1	18597.6	17914.8	-5.71001	-6.73701
299.2	18268	18606.7	17918.6	-5.79836	-6.82536
299.5	18274.9	18615.9	17922.4	-5.85471	-6.88171
299.8	18281.9	18625.2	17926.1	-5.94584	-6.97284
300.1	18288.9	18634.4	17929.8	-5.78918	-6.81618
300.4	18296	18643.7	17933.6	-5.64304	-6.67164
300.7	18303	18653	17937.4	-5.60913	-6.63773
301	18310.1	18662.3	17941.5	-5.35455	-6.38315
301.3	18317.1	18671.6	17945.7	-5.35089	-6.37949
301.6	18324.1	18680.8	17950	-5.4186	-6.4472
301.9	18331.2	18690.1	17954.5	-5.42031	-6.44891
302.2	18338.2	18699.3	17958.9	-5.38481	-6.41341
302.5	18345.2	18708.5	17963.4	-5.32146	-6.35006
302.8	18352.3	18717.8	17967.7	-5.44992	-6.47852
303.1	18359.5	18727	17971.9	-5.34544	-6.37404
303.4	18366.6	18736.2	17975.9	-5.24609	-6.27469
303.7	18373.8	18745.5	17979.7	-5.2926	-6.3212
304	18381.1	18754.7	17983.5	-5.29663	-6.32523
304.3	18388.3	18764	17987.2	-5.31123	-6.33983
304.6	18395.6	18773.2	17991	-5.34682	-6.37662
304.9	18402.9	18782.5	17994.8	-5.32999	-6.35979
305.2	18410.2	18791.8	17998.6	-5.26375	-6.29355
305.5	18417.4	18801	18002.6	-5.30124	-6.33104
305.8	18424.7	18810.3	18006.7	-5.34265	-6.37245
306.1	18431.9	18819.6	18010.8	-5.45476	-6.48456
306.4	18439.1	18828.9	18015	-5.50361	-6.53341
306.7	18446.2	18838.2	18019.1	-5.52656	-6.55636
307	18453.3	18847.5	18023.3	-5.52233	-6.55213
307.3	18460.4	18856.8	18027.5	-5.61433	-6.64413
307.6	18467.5	18866.2	18031.7	-5.52151	-6.55131
307.9	18474.5	18875.5	18035.8	-5.59432	-6.62412
308.2	18481.6	18884.8	18040	-5.54809	-6.57789
308.5	18488.6	18894.1	18044	-5.49791	-6.52771
308.8	18495.7	18903.3	18048.1	-5.51968	-6.55058
309.1	18502.9	18912.6	18052.1	-5.5826	-6.6135
309.4	18510	18921.8	18056	-5.51372	-6.54462
309.7	18517.2	18931.1	18059.9	-5.58679	-6.61769
310	18524.5	18940.3	18063.7	-5.53214	-6.56304
310.3	18531.8	18949.5	18067.6	-5.47305	-6.50395
310.6	18539.1	18958.7	18071.5	-5.45285	-6.48375
310.9	18546.4	18967.8	18075.3	-5.40455	-6.43545
311.2	18553.8	18977	18079.2	-5.53621	-6.56711
311.5	18561.1	18986.1	18083.2	-5.5556	-6.5865
311.8	18568.5	18995.2	18087.2	-5.4805	-6.5114
312.1	18575.8	19004.3	18091.1	-5.38961	-6.42051
312.4	18583	19013.4	18095.1	-5.4027	-6.4336
312.7	18590.2	19022.5	18099.1	-5.44424	-6.47514
313	18597.3	19031.5	18103.1	-5.40243	-6.43453
313.3	18604.2	19040.6	18107	-5.48255	-6.51465
313.6	18611.1	19049.6	18111	-5.46521	-6.49731
313.9	18617.9	19058.7	18114.9	-5.63615	-6.66825
314.2	18624.6	19067.8	18118.8	-5.69551	-6.72761
314.5	18631.4	19077	18122.8	-5.69697	-6.72907
314.8	18638.1	19086.2	18126.7	-5.60985	-6.64195
315.1	18644.9	19095.5	18130.7	-5.59722	-6.62932
315.4	18651.7	19104.9	18134.7	-5.59075	-6.62285
315.7	18658.5	19114.4	18138.7	-5.68033	-6.71243
316	18665.4	19123.9	18142.8	-5.66404	-6.69614
316.3	18672.3	19133.5	18146.8	-5.77427	-6.80637
316.6	18679.1	19143.1	18150.8	-5.6653	-6.6974
316.9	18685.9	19152.6	18154.7	-5.68653	-6.71863
317.2	18692.7	19162.2	18158.6	-5.85238	-6.88448
317.5	18699.5	19171.7	18162.5	-5.79776	-6.83066
317.8	18706.2	19181.2	18166.4	-5.84443	-6.87733
318.1	18713	19190.7	18170.3	-5.98629	-7.01919

## Sheet: OST3
depth (mm)	Age BP	y_plus	y_minus	d18O	d18OIVcorrected
100	10503.1	10831.6	10456.5	-3.75573	-4.00353
105	10925.2	11026.3	10900.9	-3.74616	-4.03136
110	11035.8	11075.2	11001.4	-3.30175	-3.59755
115	11120	11167.6	11090.2	-3.37959	-3.68579
120	11191.2	11243.9	11160	-3.38872	-3.69492
125	11252.8	11308.5	11218.4	-3.63985	-3.95715
130	11296.7	11322.8	11268.5	-3.93511	-4.25241
135	11346.6	11383.2	11309.4	-4.07364	-4.40224
140	11399.1	11448.2	11349.1	-3.94089	-4.26949
145	11428.4	11508.7	11383.2	-3.73875	-4.07945
150	11441.1	11516.4	11411.8	-3.41715	-3.75785
155	11475.7	11516.4	11442.3	-4.08704	-4.42774
160	11512.8	11550.6	11472.3	-4.71928	-5.07248
162	12678.8	12846.1	12474.1	-5.04903	-5.54763
162.29	12688	12854	12485.1	-5.21236	-5.71096
162.58	12697.1	12861.9	12496.2	-5.00141	-5.50001
162.87	12706.2	12869.9	12507.2	-5.02975	-5.54295
163.16	12715.3	12877.8	12518.3	-5.09039	-5.60359
163.45	12724.4	12885.7	12529.4	-5.09016	-5.60336
163.74	12733.5	12893.6	12540.5	-5.14321	-5.65641
164.03	12742.5	12901.4	12551.6	-5.17451	-5.68771
164.32	12751.6	12909.2	12562.7	-5.08519	-5.59839
164.61	12760.7	12917	12573.8	-4.97742	-5.49062
164.9	12769.8	12924.7	12584.9	-5.02288	-5.53608
165.19	12778.9	12932.5	12596	-4.83435	-5.34755
165.48	12788.1	12940.2	12607.1	-4.36629	-4.87949
165.77	12797.4	12948	12618.3	-3.97395	-4.48715
166.06	12806.7	12955.8	12629.4	-3.68375	-4.21225
166.35	12816.1	12963.6	12640.5	-3.63181	-4.16031
166.64	12825.5	12971.4	12651.5	-3.65927	-4.18777
166.93	12834.9	12979.2	12662.6	-3.67277	-4.20127
167.22	12844.2	12987	12673.7	-3.66375	-4.19225
167.51	12853.5	12994.8	12684.8	-3.77622	-4.30472
167.8	12862.7	13002.6	12695.9	-3.81	-4.3385
168.09	12871.8	13010.3	12707.1	-3.82671	-4.35521
168.38	12880.7	13017.9	12718.2	-3.78669	-4.31519
168.67	12889.6	13025.5	12729.4	-3.98738	-4.51588
168.96	12898.4	13033.1	12740.7	-3.74822	-4.27672
169.25	12907.2	13040.8	12752.1	-3.78317	-4.32607
169.54	12916.1	13048.4	12763.6	-3.71243	-4.25533
169.83	12925	13056.1	12775.2	-3.64591	-4.18881
170.12	12934.1	13063.9	12786.9	-3.65111	-4.19401
170.41	12943.3	13071.8	12798.8	-3.80021	-4.34311
170.7	12952.6	13079.7	12810.7	-3.90815	-4.45105
170.99	12961.9	13087.7	12822.4	-3.7978	-4.3407
171.28	12971.2	13095.8	12833.9	-3.7852	-4.3281
171.57	12980.4	13103.8	12844.9	-3.71914	-4.26204
171.86	12989.5	13111.9	12855.5	-3.82759	-4.37049
172.15	12998.4	13119.9	12865.4	-3.91369	-4.45659
172.44	13007.2	13128	12874.7	-3.91862	-4.47582
172.73	13015.7	13136	12883.7	-3.90697	-4.46417
173.02	13024	13144	12892.4	-3.88616	-4.44336
173.31	13032.2	13151.9	12901	-3.88246	-4.43966
173.6	13040.2	13159.9	12909.9	-3.99497	-4.55217
173.89	13048	13167.8	12919.1	-3.89613	-4.45333
174.18	13055.6	13175.6	12928.9	-3.94109	-4.49829
174.47	13063.1	13183.5	12939.2	-3.89505	-4.45225
174.76	13070.6	13191.2	12949.9	-3.71955	-4.27675
175.05	13078	13199	12961	-3.65893	-4.21613
175.34	13085.5	13206.7	12972.2	-3.50149	-4.05869
175.63	13093.1	13214.3	12983.4	-3.4436	-4.0008
175.92	13100.9	13221.8	12994.5	-3.62057	-4.19127
176.21	13108.9	13229.3	13005.5	-3.79492	-4.36562
176.5	13117.1	13236.8	13016.2	-3.76953	-4.34023
176.79	13125.6	13244.2	13026.7	-3.73532	-4.30602
177.08	13134.2	13251.6	13037.2	-3.75571	-4.32641
177.37	13143	13259	13047.7	-3.77367	-4.34437
177.66	13151.9	13266.5	13058.3	-3.82927	-4.39997
177.95	13160.9	13273.9	13069	-3.75811	-4.32881
178.24	13170	13281.5	13079.9	-3.61627	-4.18697
178.53	13179.3	13289.1	13091	-3.58452	-4.15522
178.82	13188.5	13296.8	13102.2	-3.58572	-4.15642
179.11	13197.9	13304.5	13113.6	-3.65503	-4.22573
179.4	13207.3	13312.3	13125	-3.71964	-4.30364
179.69	13216.7	13320.1	13136.4	-3.84205	-4.42605
179.98	13226.2	13327.9	13147.8	-3.78322	-4.36722
180.27	13235.7	13335.8	13159.1	-3.7364	-4.3204
180.56	13245.3	13343.6	13170.4	-3.76623	-4.35023
180.85	13254.8	13351.5	13181.6	-3.80129	-4.38529
181.14	13264.4	13359.4	13192.7	-3.79691	-4.38091
181.43	13274	13367.3	13203.8	-3.87744	-4.46144
181.72	13283.7	13375.2	13214.7	-3.85346	-4.43746
182.01	13293.4	13383.1	13225.4	-3.82052	-4.40452
182.3	13303.1	13391	13236.1	-3.83795	-4.43505
182.59	13312.8	13398.9	13246.7	-3.78365	-4.38075
182.88	13322.6	13406.9	13257.2	-3.80013	-4.39723
183.17	13332.4	13414.7	13267.7	-3.83637	-4.43347
183.46	13342.2	13422.6	13278.3	-3.8791	-4.4762
183.75	13352	13430.4	13288.9	-3.71037	-4.30747
184.04	13361.8	13438.1	13299.7	-3.59984	-4.19694
184.33	13371.7	13445.8	13310.6	-3.41725	-4.01435
184.62	13381.5	13453.5	13321.6	-3.40865	-4.00575
184.91	13391.4	13461.3	13332.7	-3.6378	-4.2349
185.49	13411.1	13477	13355	-3.58211	-4.19261
185.78	13421.1	13485.2	13366.1	-3.55062	-4.16112
186.07	13431	13493.5	13377.1	-3.38373	-3.99423
186.36	13441	13502.1	13388.1	-3.23094	-3.84144
186.65	13451.1	13510.9	13399	-3.23234	-3.84284
186.94	13461.1	13519.8	13409.8	-3.15012	-3.76062
187.23	13471.1	13528.7	13420.6	-3.41876	-4.02926
187.52	13481.2	13537.5	13431.4	-3.58144	-4.19194
187.81	13491.1	13546.3	13442.1	-3.61665	-4.22715
188.1	13501.1	13554.8	13452.9	-3.47901	-4.10231
188.39	13511	13563.2	13463.8	-3.57158	-4.19488
188.68	13520.9	13571.4	13474.6	-3.6409	-4.2642
188.97	13530.8	13579.5	13485.5	-3.54408	-4.16738
189.26	13540.6	13587.6	13496.4	-3.4116	-4.0349
189.55	13550.4	13595.8	13507.3	-3.30791	-3.93121
189.84	13560.2	13604	13518.2	-3.36067	-3.98397
190.13	13570	13612.5	13529.2	-3.39913	-4.02243
190.42	13579.7	13621.1	13540.1	-3.51275	-4.13605
190.71	13589.5	13629.9	13551	-3.3833	-4.0066
191.01	13599.6	13639.2	13562.3	-3.49411	-4.13041
191.31	13609.7	13648.5	13573.5	-3.19752	-3.83382
191.61	13619.8	13657.9	13584.7	-3.24009	-3.87639
191.91	13629.9	13667.3	13595.8	-3.12616	-3.76246
192.21	13640	13676.6	13606.7	-3.13177	-3.76807
192.51	13650.2	13685.9	13617.6	-3.21893	-3.85523
192.81	13660.3	13695.2	13628.4	-3.16362	-3.79992
193.41	13680.6	13714	13649.8	-3.41611	-4.05241
193.71	13690.8	13723.6	13660.5	-3.62685	-4.26315
194.01	13701	13733.3	13671	-3.73162	-4.38072
194.31	13711.2	13743.2	13681.5	-3.75522	-4.40432
194.61	13721.5	13753.2	13692	-3.83473	-4.48383
194.91	13731.7	13763.5	13702.3	-3.60675	-4.25585
195.21	13741.9	13773.8	13712.6	-3.84332	-4.49242
195.51	13752.2	13784.2	13722.7	-3.5204	-4.1695
195.81	13762.5	13794.7	13732.6	-3.54572	-4.19482
196.11	13772.8	13805.2	13742.4	-3.40618	-4.05528
196.41	13783	13815.7	13751.9	-3.66918	-4.31828
196.71	13793.4	13826.2	13761.3	-3.33219	-3.98129
197.01	13803.7	13836.8	13770.6	-3.19979	-3.86219
197.31	13814	13847.4	13779.7	-3.08656	-3.74896
197.61	13824.3	13858	13788.6	-3.4396	-4.102
197.91	13834.6	13868.6	13797.5	-3.85448	-4.51688
198.21	13844.8	13879.3	13806.3	-3.85019	-4.51259
198.51	13855.1	13889.9	13815.1	-4.09911	-4.76151
198.81	13865.3	13900.6	13823.8	-3.86776	-4.53016
199.11	13875.6	13911.4	13832.6	-3.81587	-4.47827
199.41	13885.8	13922.2	13841.4	-3.68304	-4.34544
199.71	13896.1	13933	13850.3	-3.51824	-4.18064
200.01	13906.4	13943.9	13859.4	-3.55621	-4.23171
200.31	13916.8	13954.9	13868.6	-3.40854	-4.08404
200.61	13927.2	13965.9	13877.8	-3.30692	-3.98242
200.91	13937.6	13976.9	13887	-3.28897	-3.96447
201.21	13948.1	13987.9	13896.1	-3.43677	-4.11227
201.51	13958.6	13998.9	13904.8	-3.33576	-4.01126
201.81	13969.2	14009.9	13913.3	-3.59679	-4.27229
202.11	13979.8	14020.8	13921.3	-3.56695	-4.24245
202.41	13990.5	14031.7	13928.8	-3.33064	-4.00614
202.71	14001.2	14042.5	13936.3	-3.53535	-4.22335
203.01	14011.9	14053.3	13943.9	-3.28792	-3.97592
203.31	14022.8	14064	13951.9	-3.36455	-4.05255
203.61	14033.6	14074.6	13960.7	-3.56215	-4.25015
203.91	14044.6	14085.1	13970.5	-3.56447	-4.25247
204.21	14055.6	14095.5	13981.6	-3.53957	-4.22757
204.51	14066.7	14105.9	13993.9	-3.49761	-4.18561
204.81	14077.8	14116.3	14007.1	-3.51477	-4.20277
205.11	14089	14126.7	14021.1	-3.40574	-4.09374
205.71	14111.2	14147.9	14050.3	-3.47989	-4.18019
206.01	14122.2	14158.7	14065	-3.39617	-4.09647
206.31	14133.1	14169.7	14079.4	-3.52417	-4.22447
206.61	14143.9	14181	14093.5	-3.43282	-4.13312
206.91	14154.7	14192.4	14107.3	-3.66878	-4.36908
207.21	14165.4	14203.8	14120.6	-3.34109	-4.04139
207.51	14176.1	14215.4	14133.5	-3.32434	-4.02464
207.81	14186.8	14226.9	14145.9	-3.45439	-4.15469
208.11	14197.5	14238.4	14157.7	-3.47147	-4.17177
208.41	14208.2	14249.9	14168.9	-3.47795	-4.19045
208.71	14218.9	14261.4	14179.7	-3.88232	-4.59482
209.01	14229.5	14272.8	14190.1	-3.6966	-4.4091
209.31	14240.2	14284.2	14200.2	-3.78186	-4.49436
209.61	14250.9	14295.6	14210.1	-3.75088	-4.46338
209.91	14261.5	14307.1	14220	-3.60573	-4.31823
210.21	14272.2	14318.5	14229.9	-3.80925	-4.52175
210.51	14282.8	14330	14239.7	-3.63556	-4.34806
210.81	14293.5	14341.5	14249.6	-4.06175	-4.77425
211.11	14304.1	14353.1	14259.6	-3.94635	-4.67095
211.71	14325.4	14376.1	14279.5	-3.73355	-4.45815
212.01	14336.1	14387.6	14289.4	-3.76992	-4.49452
212.31	14346.8	14399.2	14299.4	-3.33062	-4.05522
212.61	14357.6	14410.6	14309.4	-3.56445	-4.28905
212.91	14368.3	14422.1	14319.4	-3.55317	-4.27777
213.51	14389.8	14445	14339.4	-3.17266	-3.89726
213.81	14400.6	14456.5	14349.4	-3.15034	-3.88724
214.11	14411.4	14468	14359.4	-3.52604	-4.26294
214.71	14432.9	14490.9	14379.5	-3.28045	-4.01735
215.01	14443.6	14502.4	14389.6	-3.60177	-4.33867
215.31	16319.8	16581.4	16101.8	-3.23446	-4.16816
215.61	16334.5	16590.7	16119.6	-3.44891	-4.38261
215.91	16349.3	16600	16137.5	-4.19906	-5.13276
216.21	16364	16609.3	16155.4	-5.74918	-6.68288
216.51	16378.7	16618.5	16173.4	-5.94123	-6.87493
216.81	16393.4	16627.7	16191.4	-6.66889	-7.60259
217.11	16408	16636.9	16209.4	-6.13061	-7.07161
217.41	16422.6	16646.2	16227.4	-5.95681	-6.89781
217.71	16437.1	16655.7	16245.2	-5.85706	-6.79806
218.01	16451.6	16665.3	16263	-5.81034	-6.75134
218.31	16466	16675.2	16280.6	-5.82071	-6.76171
218.61	16480.4	16685.3	16298.2	-5.74183	-6.68283
218.91	16494.8	16695.6	16315.7	-5.73587	-6.67687
219.21	16509.2	16706.1	16333.3	-5.70462	-6.65282
219.51	16523.8	16716.9	16351	-5.98918	-6.93738
219.81	16538.6	16727.9	16368.9	-5.95685	-6.90505
220.11	16553.6	16739.1	16387	-6.22529	-7.17349
220.71	16584.3	16762.3	16424	-5.45777	-6.40597
221.01	16599.9	16774.2	16442.7	-5.50223	-6.45693
221.31	16615.7	16786.4	16461.4	-5.64139	-6.59609
221.61	16631.7	16798.9	16480.2	-5.89806	-6.85276
221.91	16647.7	16811.6	16499	-5.96253	-6.91723
222.21	16663.9	16824.6	16517.7	-5.90264	-6.85734
222.51	16680	16837.9	16536.3	-5.88375	-6.83845
222.81	16696.1	16851.2	16554.8	-5.86564	-6.82034
223.11	16712.2	16864.5	16573.2	-5.60683	-6.56793
223.71	16743.6	16890.8	16609.8	-5.72234	-6.68344
224.01	16759	16903.6	16628	-5.58616	-6.54726
224.31	16774	16916	16646.2	-5.51389	-6.47499
224.61	16788.7	16928.1	16664.3	-5.5959	-6.557
224.91	16803.2	16939.9	16682.3	-5.44995	-6.41745
225.21	16817.5	16951.6	16700.3	-5.66834	-6.63584
225.51	16831.6	16963.1	16718.2	-5.88482	-6.85232
225.81	16845.7	16974.5	16735.9	-5.60728	-6.57478
226.11	16859.7	16986	16753.6	-5.37694	-6.34444
226.41	16873.7	16997.5	16771.2	-5.42738	-6.39488
226.71	16887.7	17009	16788.6	-5.40287	-6.37037
227.01	16901.8	17020.6	16805.8	-5.1545	-6.1286
227.31	16915.9	17032.2	16822.8	-5.24497	-6.21907
227.61	16930.1	17043.9	16839.5	-5.39268	-6.36678
227.91	16944.4	17055.5	16856	-5.45586	-6.42996
228.21	16958.7	17067.3	16872.1	-5.31102	-6.28512
228.51	16973.2	17079	16887.8	-5.01654	-5.99064
228.81	16987.7	17090.9	16903.3	-5.44165	-6.41575
229.11	17002.2	17102.7	16918.6	-5.3548	-6.3346
229.41	17016.8	17114.6	16933.6	-5.83291	-6.81271
229.71	17031.3	17126.5	16948.4	-5.53836	-6.51816
230.01	17045.8	17138.4	16963.1	-5.26583	-6.24563
230.31	17060.2	17150.4	16977.6	-5.65262	-6.63242
230.61	17074.6	17162.5	16992	-5.08083	-6.06063
230.91	17089	17174.8	17006.3	-4.87152	-5.85132
231.21	17103.4	17187.2	17020.4	-5.04288	-6.02798
231.51	17117.9	17200	17034.2	-5.15527	-6.14037
231.81	17132.5	17213	17047.9	-5.16418	-6.14928
232.11	17147.2	17226.5	17061.3	-5.27161	-6.25671
232.41	17162.1	17240.3	17074.4	-5.26959	-6.25469
232.71	17177	17254.2	17087.1	-5.28685	-6.27195
233.01	17191.9	17268.1	17099.4	-5.13997	-6.12507
233.31	17206.8	17281.8	17111.2	-5.44381	-6.43431
233.61	17221.6	17294.9	17122.4	-5.70715	-6.69765
233.91	17236.2	17307.4	17133	-5.70929	-6.69979
234.21	17250.7	17319.1	17142.8	-5.77986	-6.77036
234.81	17279.3	17343.1	17161.4	-5.40653	-6.39703
235.11	17293.8	17357.5	17171	-5.61465	-6.60515
235.41	17308.5	17374.9	17181.3	-5.99272	-6.98812
235.71	17323.7	17396.5	17192.9	-5.95381	-6.94921
236.01	17339.3	17423.2	17206	-6.10951	-7.10491
236.31	17355.5	17455.7	17220.9	-6.16641	-7.16181
236.61	17372.3	17492	17237.7	-5.61797	-6.61337
236.91	17389.4	17530.1	17255.9	-5.52195	-6.51735
237.21	17406.6	17567.7	17275.5	-5.41817	-6.41847
237.51	17423.9	17602.6	17296.1	-5.46919	-6.46949
237.81	17441.1	17632.6	17317.7	-6.36187	-7.36217
238.11	17458	17655.5	17339.9	-5.75185	-6.75215
238.41	17474.5	17670.7	17362.4	-5.45412	-6.45442
238.71	17490.6	17679.5	17384.9	-5.42922	-6.42952
239.01	17506.3	17683.6	17406.9	-5.31596	-6.32076
239.31	17521.6	17684.4	17427.9	-5.40522	-6.41002
239.61	17536.4	17684.4	17447.5	-5.42612	-6.43092
239.91	17550.7	17684.4	17465.4	-5.21648	-6.22128
240.21	17564.5	17685.6	17481	-5.23385	-6.23865
240.51	17577.8	17689.2	17494.5	-5.14729	-6.15209
241.11	17603.1	17702.2	17516.8	-5.17053	-6.17933
241.41	17615.2	17711.2	17526.4	-5.14017	-6.14897
241.71	17627	17721.6	17535.3	-5.26788	-6.27668
242.01	17638.5	17733.2	17544.2	-5.36566	-6.37446
242.31	17649.8	17745.8	17553.1	-5.36301	-6.37181
242.61	17660.8	17759.4	17562.1	-5.34032	-6.34912
242.91	17671.6	17773.8	17571	-5.28086	-6.28966
243.21	17682.1	17789	17579.8	-5.31023	-6.31903
243.51	17692.3	17804.9	17588.3	-5.48448	-6.49328
243.81	17702.2	17821.3	17596.4	-5.45213	-6.46503
244.11	17711.8	17838.2	17604	-5.59696	-6.60986
244.41	17721	17855.4	17610.9	-5.48926	-6.50216
244.71	17729.6	17872.2	17617.4	-5.42264	-6.43554
245.01	17737.2	17885.6	17623.3	-5.31272	-6.32562
245.31	17743.8	17892.8	17628.8	-5.18393	-6.19683
245.61	17748.9	17899	17633.8	-5.11648	-6.12938
245.91	17751.1	17903.8	17638.5	-5.36652	-6.37942
246.21	17751.9	17907.1	17642.9	-5.62686	-6.63976
246.51	17751.9	17908.9	17646.9	-5.527	-6.5399
246.81	17752	17909.3	17650.8	-5.399	-6.4119
247.11	17752	17909.3	17654.4	-5.57156	-6.58446
247.41	17752.1	17909.3	17658	-5.49873	-6.51163
247.71	17752.2	17909.3	17661.5	-5.11169	-6.12459
248.01	17752.3	17909.3	17664.9	-5.12122	-6.13412
248.31	17753.5	17909.3	17668.5	-5.11034	-6.12324
248.61	17756.8	17909.3	17672	-5.12213	-6.13503
248.91	17761.8	17909.3	17675.6	-5.09108	-6.10398
249.21	17767.7	17909.3	17679.1	-5.09792	-6.11082
249.51	17774	17909.3	17682.5	-5.11921	-6.13211
249.81	17780.5	17909.3	17685.9	-5.09914	-6.11204
250.11	17786.8	17909.3	17689.2	-5.15112	-6.16402
250.41	17792.8	17910.4	17692.4	-5.08128	-6.09418
250.71	17798.5	17912.6	17695.5	-5.21823	-6.23113
251.01	17804	17915.7	17698.4	-5.26106	-6.27756
251.31	17809.2	17919.5	17701.1	-5.41895	-6.43545
251.61	17814.4	17923.8	17703.7	-5.19292	-6.20942
251.91	17819.5	17928.3	17706.1	-5.20119	-6.21769
252.21	17824.7	17933	17708.4	-5.62018	-6.63668
252.51	17829.8	17939.7	17710.4	-5.54917	-6.56567
252.81	17835	17948.9	17712.4	-5.64052	-6.65702
253.11	17840.1	17958	17714.3	-5.61818	-6.63468
253.41	17845.3	17967	17716.3	-5.47108	-6.48758
253.71	17850.3	17975.8	17718.3	-5.68618	-6.70268
254.01	17855.3	17984.5	17720.5	-5.80735	-6.82385
254.31	17860.3	17993	17722.9	-5.59489	-6.61139
254.61	17865.2	18001.3	17725.5	-5.38186	-6.39836
254.91	17870	18009.6	17728.2	-5.36063	-6.37713
255.21	17874.9	18017.8	17731	-5.3383	-6.3548
255.51	17879.9	18025.9	17734	-5.26123	-6.27773
255.81	17884.9	18034.1	17737.1	-5.10524	-6.12174
256.11	17890	18042.4	17740.2	-5.28738	-6.30388
256.41	17895.3	18050.7	17743.4	-5.27968	-6.29618
256.71	17900.6	18059.1	17746.6	-5.22991	-6.25021
257.01	17906.1	18067.5	17749.7	-5.36395	-6.38425
257.31	17911.8	18075.9	17752.6	-5.39552	-6.41582
257.61	17917.6	18084.2	17755.3	-5.35643	-6.37673
257.91	17923.5	18092.3	17757.8	-5.34446	-6.36476
258.21	17929.6	18100.4	17759.9	-5.30746	-6.32776
258.51	17935.7	18108.3	17761.7	-5.43927	-6.45957
258.81	17941.9	18116.1	17763.3	-5.37591	-6.39621
259.11	17948.1	18123.8	17764.8	-5.42993	-6.45023

## Sheet: OST1
depth (mm)	BP	y_plus	y_minus	d18O	d18O ice
22	10144.5	10477.2	9843.5	-3.35029	-3.56989
27	10547.9	10832.6	10295.9	-3.25717	-3.50497
32	10952.8	11190.8	10747.9	-3.27174	-3.55694
37	11357.1	11547.9	11199.4	-3.59629	-3.93699
42	11762.8	11901.1	11647.7	-4.82719	-5.20639
47	12171	12212.2	12084.2	-5.24201	-5.67411
52	12592.6	12988.8	12521.8	-4.62005	-5.10475
57	13015.7	13063	12937.8	-3.38954	-3.94674
62	13113.4	13261.1	13074.5	-3.53129	-4.10199
67	13186.9	13261.1	13154.5	-3.57494	-4.14564
72	13261.9	13295	13232.6	-3.49997	-4.08397
77	13337.3	13373.1	13307.7	-3.8435	-4.4406
82	13412.6	13540.5	13380.5	-3.69965	-4.31015
87	13488.1	13612.3	13454.3	-3.8375	-4.448
92	13564.8	13678.7	13526.8	-3.68145	-4.30475
97	13641.5	13729.7	13597.8	-3.63798	-4.27428
102	13714.1	13785.2	13669	-3.5914	-4.2405
107	13785.6	13838.8	13738.8	-3.82171	-4.47081
112	13855.1	13901.1	13797.5	-3.47229	-4.13469
117	13922.8	13978.6	13851.7	-3.5639	-4.2394
122	13990.7	14057.3	13901.7	-3.4587	-4.1342
127	14063.7	14136	13928.4	-3.41633	-4.10433
132	14131.7	14214.1	13954.8	-3.63161	-4.33191
137	14185.7	14287.8	13979.1	-3.63792	-4.33822
142	14191.2	14322.2	14003.4	-3.21987	-3.92017
147	14196.7	14327.3	14024.3	-3.7341	-4.4466
152	14219	14327.3	14049.9	-4.2643	-4.9768
157	14244.6	14352.2	14076.3	-3.52255	-4.23505
162	14269.9	14385.7	14099.9	-3.5681	-4.2927
167	14293.2	14435.3	14099.9	-3.5426	-4.2672
172	14314.7	14485	14126.7	-3.4596	-4.1842
177	14334.1	14533.5	14177.6	-3.40788	-4.13248
182	14353.4	14578.4	14229.5	-3.32936	-4.05396
187	14400.5	14628.2	14284.4	-3.68001	-4.41691
192	14463.9	14678.9	14374.4	-3.23896	-3.97586
197	14565	14730.2	14485	-3.21867	-3.96757
202	14668.1	14781.7	14595.3	-3.00508	-3.76558
207	14769.4	14838.1	14707.3	-2.97697	-3.74977
212	14862.3	14914.8	14808.5	-3.96936	-4.75406
217	14962.1	15011.9	14862.8	-5.19535	-5.99215
222	15064.9	15111.6	14918.5	-5.51882	-6.32662
227	15164.3	15210.9	14981.7	-5.89862	-6.71732
232	15267	15312.3	15033.6	-5.68716	-6.51686
237	15372.6	15415	15084.8	-5.49151	-6.33181
242	15481.8	15521.4	15423.1	-5.89515	-6.74555
247	15590.1	15628.1	15537.8	-5.92546	-6.78626
252	15703.9	15738.3	15653	-6.5607	-7.442
257	15823.2	15857.9	15783.6	-6.40386	-7.29486
262	15941.9	15981.8	15892.5	-6.95626	-7.85726
267	16061	16107	15995.1	-7.90389	-8.81369
272	16182.5	16234.2	16098.3	-6.14537	-7.06337
277	16322.8	16365.1	16211.5	-6.19343	-7.12713
282	16455.6	16500	16415.3	-6.05912	-7.00012
287	16581.8	16633.9	16538.2	-5.30235	-6.25055
292	16706.6	16766.4	16658.3	-5.62756	-6.58866
297	16831.1	16899.3	16776.5	-5.72707	-6.69457
302	16957.7	17032.4	16897	-5.57859	-6.55269
307	17085.5	17238	17015.9	-5.31657	-6.29637
312	17233.9	17483	17136.4	-5.38846	-6.37896
317	17448.6	17612.5	17271.8	-5.19589	-6.19619
322	17647.7	17756.7	17554.3	-5.74269	-6.75149
327	17779.2	17865	17698.6	-4.84475	-5.85765
332	17908	17974.3	17844.6	-4.5668	-5.5871
337	18036	18098.2	17971.5	-3.70045	-4.72335
342	18164.5	18228.7	18099.4	-3.48894	-4.51404
347	18294.5	18364.6	18219.6	-3.87506	-4.90206
352	18423.7	18505.9	18333.9	-3.84876	-4.87856
357	18552.8	18648.2	18446.5	-3.78929	-4.82019
362	18681.5	18796.8	18561.1	-3.21889	-4.25099
