# Supplementary material for: Temperature variability in southern Europe over the past 16 500 years constrained by speleothem fluid inclusion water isotopes
Source: Copernicus journal article supplement (doi:10.5194/cp-21-1235-2025), 2025-07-16
Supplement: Supplementary file 1 [file cp-21-1235-2025-supplement.zip]

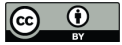

*Supplement of*

**Temperature variability in southern Europe over the past 16 500 years constrained by speleothem fluid inclusion water isotopes**

**Juan Luis Bernal-Wormull et al.**

*Correspondence to:* Ana Moreno (amoreno@ipe.csic.es)

- cp-21-1235-2025-supplement-title-page.pdf
- Supplementary material.xlsx

The copyright of individual parts of the supplement might differ from the article licence.
